# Supplementary material for: Suppression of Kasha's rule as a mechanism for fluorescent molecular rotors and aggregation-induced emission
Source: Springer Nature journal article supplement (doi:10.1038/nchem.2612), 2016-09-26
Supplement: 41557_2017_BFnchem2612_MOESM6_ESM.fcf [file 41557_2017_BFnchem2612_MOESM6_ESM.fcf]

data_publication_text
_publ_requested_journal          'Nature Chemistry'
_publ_contact_author_name        'Ivan Aprahamian'
_publ_contact_author_address     
;Department of Chemistry
Dartmouth College
Hanover, NH, 03755
;
_publ_contact_author_email       Ivan.Aprahamian@dartmouth.edu
_publ_contact_author_phone       6036469666
loop_
_publ_author_name
_publ_author_address
'Aprahamian, Ivan'
;Department of Chemistry
Dartmouth College
Hanover, NH, 03755
;
'Qian, Hai'
;Department of Chemistry
Dartmouth College
Hanover, NH, 03755
;
'Wakefield, Audrey'
;Department of Chemistry
Dartmouth College
Hanover, NH, 03755
;
'Cousins, Morgan E.'
;Department of Chemistry
University of Vermont
Burlington, VT, 05405
;
'Liptak, Matthew D.'
;Department of Chemistry
University of Vermont
Burlington, VT, 05405
;
'Horak, Erik H.'
;Department of Chemistry
University of Vermont
Burlington, VT, 05405
;

# 
# h,k,l, Fc-squared, Fo-squared, sigma(Fo-squared) and status flag 
# 
data_ia813d 
_shelx_title ' ia813d in P2(1)/c' 
_shelx_refln_list_code          4 
_shelx_F_calc_maximum      159.72 
_exptl_crystal_F_000       616.00 
_reflns_d_resolution_high  0.8294 
 
loop_ 
 _symmetry_equiv_pos_as_xyz 
 'x, y, z' 
 '-x, y+1/2, -z+1/2' 
 '-x, -y, -z' 
 'x, -y-1/2, z-1/2' 
 
_cell_length_a    13.7467 
_cell_length_b     8.8403 
_cell_length_c    12.9567 
_cell_angle_alpha  90.000 
_cell_angle_beta  114.796 
_cell_angle_gamma  90.000 
 
_shelx_F_squared_multiplier     1.000 
 
loop_ 
 _refln_index_h 
 _refln_index_k 
 _refln_index_l 
 _refln_F_squared_calc 
 _refln_F_squared_meas 
 _refln_F_squared_sigma 
 _refln_observed_status 
   1   0   0      503.20      122.16      5.91 o 
   2   0   0    24934.78    23663.47    351.71 o 
   3   0   0      311.06      325.16     10.06 o 
   4   0   0      283.06      286.44     10.71 o 
   5   0   0       25.82       33.85      5.51 o 
   6   0   0       86.32      115.19      8.54 o 
   7   0   0     4736.99     4948.88     81.72 o 
   8   0   0      205.64      260.75     14.97 o 
   9   0   0      561.56      607.35     23.62 o 
  10   0   0        5.06       -3.78      3.78 o 
  11   0   0       14.13       11.12      8.73 o 
  12   0   0        8.76        0.53      5.79 o 
  13   0   0       52.06       49.76     19.20 o 
  14   0   0        5.29       -7.67      7.67 o 
  15   0   0        6.46       10.16      9.71 o 
   1   1   0     2090.18     1941.30     18.45 o 
   2   1   0      500.38      483.25      5.56 o 
   3   1   0     4488.73     4368.05     35.21 o 
   4   1   0     5552.76     5291.87     39.74 o 
   5   1   0      127.50      128.46      3.32 o 
   6   1   0      549.55      549.32      9.73 o 
   7   1   0       60.30       55.36      3.58 o 
   8   1   0       61.09       79.67      6.70 o 
   9   1   0        8.31        3.81      2.96 o 
  10   1   0      285.15      293.95     12.57 o 
  11   1   0      191.03      227.64     12.04 o 
  12   1   0        0.15        2.14      4.62 o 
  13   1   0       12.06       11.56      5.68 o 
  14   1   0        3.01       -3.55      5.71 o 
   0   2   0     9700.50    10036.14     91.27 o 
   1   2   0      961.78      995.60     11.70 o 
   2   2   0    13891.41    14106.63    104.41 o 
   3   2   0      261.75      285.28      5.19 o 
   4   2   0     1320.35     1314.30     13.53 o 
   5   2   0        0.54        1.69      1.31 o 
   6   2   0      592.61      639.10     11.02 o 
   7   2   0      198.41      195.43      6.41 o 
   8   2   0       28.41       35.09      4.41 o 
   9   2   0       13.58        6.18      3.06 o 
  10   2   0       15.92       13.75      4.32 o 
  11   2   0        5.45       13.90      4.92 o 
  12   2   0       67.42       68.41      8.61 o 
  13   2   0       77.39       96.91     10.96 o 
  14   2   0        0.02       -1.90      5.36 o 
   1   3   0      161.72      184.03      4.66 o 
   2   3   0       16.55       13.99      1.88 o 
   3   3   0      656.00      685.49     10.24 o 
   4   3   0      288.83      312.10      6.43 o 
   5   3   0      671.37      728.44     11.17 o 
   6   3   0      145.05      138.52      5.25 o 
   7   3   0       13.78        9.28      2.37 o 
   8   3   0       45.47       48.10      6.39 o 
   9   3   0       21.09       22.37      4.34 o 
  10   3   0      412.98      406.59     13.88 o 
  11   3   0        0.88        4.76      3.90 o 
  12   3   0       96.88       92.77      9.87 o 
  13   3   0       12.12       13.62      6.34 o 
  14   3   0        1.64       -2.30      4.97 o 
   0   4   0        4.86        2.17      2.05 o 
   1   4   0      917.51      968.38     11.93 o 
   2   4   0       10.46       10.82      1.93 o 
   3   4   0       33.67       27.80      2.80 o 
   4   4   0     1275.02     1422.90     16.71 o 
   5   4   0       49.45       62.64      4.06 o 
   6   4   0     1587.54     1574.50     18.66 o 
   7   4   0       16.65       11.44      3.02 o 
   8   4   0      269.56      281.65     10.65 o 
   9   4   0       61.26       64.62      6.65 o 
  10   4   0      101.80       97.38      8.32 o 
  11   4   0        7.05       11.75      4.53 o 
  12   4   0       16.39       17.87      5.38 o 
  13   4   0       62.34       65.75      9.26 o 
   1   5   0      108.29      132.36      4.60 o 
   2   5   0        2.71        0.00      1.59 o 
   3   5   0        8.70        6.89      2.44 o 
   4   5   0      380.85      365.77      8.25 o 
   5   5   0      334.50      319.25      7.95 o 
   6   5   0        1.79        1.13      1.95 o 
   7   5   0       89.27       54.49      4.94 o 
   8   5   0       21.20       17.51      3.89 o 
   9   5   0       11.96       15.90      4.42 o 
  10   5   0        0.92        4.58      3.97 o 
  11   5   0        1.04        4.30      4.36 o 
  12   5   0      124.32      123.15     10.58 o 
  13   5   0       11.06       10.72      5.79 o 
   0   6   0      306.16      269.36     11.09 o 
   1   6   0        8.26        6.03      2.26 o 
   2   6   0        0.15        2.71      1.80 o 
   3   6   0        1.96        1.87      2.06 o 
   4   6   0        7.76        4.04      2.13 o 
   5   6   0      123.60      107.42      8.22 o 
   6   6   0        0.32        1.14      2.29 o 
   7   6   0       23.15       31.39      4.29 o 
   8   6   0        5.93        2.68      3.72 o 
   9   6   0        0.63        1.45      3.73 o 
  10   6   0        0.66        0.39      4.06 o 
  11   6   0        1.09       -0.12      4.56 o 
  12   6   0       31.06       39.16      7.66 o 
   1   7   0      111.23      110.15      9.53 o 
   2   7   0      152.97      172.06      8.00 o 
   3   7   0       23.32       29.30      4.14 o 
   4   7   0       73.62       86.69      6.49 o 
   5   7   0      183.94      203.85      8.61 o 
   6   7   0        1.66        3.47      3.72 o 
   7   7   0        2.26        1.07      4.02 o 
   8   7   0        7.68       10.26      5.46 o 
   9   7   0        8.02        0.56      5.28 o 
  10   7   0       12.55       17.62      9.02 o 
  11   7   0        0.13        4.16      8.52 o 
   0   8   0       33.68       13.52     21.34 o 
   1   8   0        0.00       -0.22      3.79 o 
   2   8   0      272.06      306.69     11.89 o 
   3   8   0       20.50       10.84      4.95 o 
   4   8   0       16.45       11.17      4.29 o 
   5   8   0      122.17      140.59      9.36 o 
   6   8   0       18.04       25.67      5.22 o 
   7   8   0        1.72       -0.27      6.83 o 
   8   8   0        8.39       -0.45      7.53 o 
   9   8   0       27.16       41.32     11.10 o 
   1   9   0        0.01        5.10      4.23 o 
   2   9   0       31.68       35.39      7.37 o 
   3   9   0       17.69        6.63      5.17 o 
   4   9   0        3.63       -1.51      4.47 o 
   5   9   0        5.31        1.00      4.99 o 
   6   9   0        4.31       -0.39      5.17 o 
   7   9   0        4.84       -5.97      5.97 o 
   8   9   0        0.16        4.07      6.65 o 
   0  10   0        3.09        3.10      9.17 o 
   1  10   0        4.77        5.15      6.00 o 
   2  10   0       34.00       33.28      7.62 o 
   3  10   0        9.18        1.57      5.17 o 
   4  10   0        2.04        7.05      5.50 o 
   5  10   0       26.39       35.29      8.23 o 
 -15   1   1        5.68       -0.47      6.24 o 
 -14   1   1        0.12       -4.43      5.17 o 
 -13   1   1      101.89       94.24      9.94 o 
 -12   1   1        3.58        2.98      4.05 o 
 -11   1   1       43.10       28.55      5.68 o 
 -10   1   1       10.55       21.17      4.47 o 
  -9   1   1       17.86       16.75      3.62 o 
  -8   1   1     3319.57     3453.03     40.31 o 
  -7   1   1      986.29     1111.79     13.23 o 
  -6   1   1     1124.07     1213.33     13.55 o 
  -5   1   1      351.56      313.63      5.86 o 
  -4   1   1      273.11      269.01      5.16 o 
  -3   1   1      166.32      171.60      4.68 o 
  -2   1   1       34.07       40.82      2.24 o 
  -1   1   1     8642.52     8796.46     79.60 o 
   0   1   1      397.94      333.07      5.32 o 
   1   1   1     7818.15     7786.34     50.27 o 
   2   1   1     1017.33      933.60      8.68 o 
   3   1   1      511.58      523.83      6.13 o 
   4   1   1        0.51        0.38      1.01 o 
   5   1   1      133.20      139.62      4.01 o 
   6   1   1       45.61       37.35      4.47 o 
   7   1   1      607.78      598.62     11.09 o 
   8   1   1       16.41       11.74      3.59 o 
   9   1   1      109.72      125.29      8.59 o 
  10   1   1       28.88       39.44      6.21 o 
  11   1   1        0.13       -1.34      3.74 o 
  12   1   1      119.88      113.59     13.40 o 
  13   1   1        4.51       -5.03      5.03 o 
  14   1   1        1.30       -1.36      5.91 o 
 -15   2   1        0.81       -1.02      5.58 o 
 -14   2   1       38.05       30.54      7.40 o 
 -13   2   1       28.24       33.20      7.03 o 
 -12   2   1        2.41        1.74      4.06 o 
 -11   2   1       21.16       17.74      5.22 o 
 -10   2   1        2.54        1.06      2.77 o 
  -9   2   1       53.51       55.29      5.63 o 
  -8   2   1       22.59       20.39      3.30 o 
  -7   2   1       15.60       24.75      3.51 o 
  -6   2   1       48.75       51.95      5.28 o 
  -5   2   1       48.44       58.66      3.13 o 
  -4   2   1     3765.60     3806.59     33.22 o 
  -3   2   1     2213.56     2215.94     19.19 o 
  -2   2   1     3744.55     3756.82     28.84 o 
  -1   2   1      914.06      941.33      9.46 o 
   0   2   1     1294.80     1343.01     14.83 o 
   1   2   1       35.51       31.98      2.24 o 
   2   2   1    25509.95    26423.50    191.56 o 
   3   2   1     2645.40     2701.32     25.04 o 
   4   2   1      580.66      548.68      8.66 o 
   5   2   1      467.82      454.45      6.80 o 
   6   2   1        3.42        1.48      1.22 o 
   7   2   1        6.31        0.86      2.06 o 
   8   2   1      102.74      122.56      7.90 o 
   9   2   1      673.34      691.85     18.94 o 
  10   2   1      170.53      202.69     17.98 o 
  11   2   1      153.36      157.90     11.42 o 
  12   2   1        0.72        6.01      5.37 o 
  13   2   1        0.20        2.97      5.55 o 
  14   2   1        0.03       -2.65      5.39 o 
 -14   3   1        7.56       11.01      6.07 o 
 -13   3   1       36.60       52.87      8.31 o 
 -12   3   1       14.08        2.16      4.37 o 
 -11   3   1      199.92      206.63     10.41 o 
 -10   3   1        0.90       -1.70      2.83 o 
  -9   3   1        0.98        2.01      2.56 o 
  -8   3   1       10.23        9.79      2.66 o 
  -7   3   1      976.31     1008.62     17.15 o 
  -6   3   1       90.73       77.95      4.27 o 
  -5   3   1      210.79      263.86      6.78 o 
  -4   3   1      519.07      523.67      8.33 o 
  -3   3   1      134.29      119.08      4.92 o 
  -2   3   1     2346.85     2354.18     24.28 o 
  -1   3   1      256.28      326.88      6.43 o 
   0   3   1      489.27      508.73      7.23 o 
   1   3   1     3929.52     4070.20     34.96 o 
   2   3   1       69.18       60.48      4.71 o 
   3   3   1        1.34       -1.44      1.44 o 
   4   3   1       53.52       55.78      5.86 o 
   5   3   1     2430.26     2486.68     22.41 o 
   6   3   1      259.08      233.77      5.55 o 
   7   3   1       28.87       20.52      3.14 o 
   8   3   1      319.28      339.63     16.67 o 
   9   3   1      106.21       78.41      9.74 o 
  10   3   1      188.13      197.12     11.29 o 
  11   3   1       13.06       23.39      6.50 o 
  12   3   1        0.63       -2.86      4.40 o 
  13   3   1       78.72       85.08     13.76 o 
 -14   4   1        0.13        9.43      5.98 o 
 -13   4   1       24.73       18.82      5.86 o 
 -12   4   1        4.29        5.24      4.46 o 
 -11   4   1       50.99       32.90      5.85 o 
 -10   4   1        2.41        3.28      3.67 o 
  -9   4   1       31.61       36.64      7.32 o 
  -8   4   1        1.49        3.36      2.54 o 
  -7   4   1      103.17      118.57      5.65 o 
  -6   4   1        6.78        2.87      1.90 o 
  -5   4   1      818.20      859.54     12.44 o 
  -4   4   1       83.55      101.70      4.09 o 
  -3   4   1     1771.71     1872.94     19.38 o 
  -2   4   1      119.11      127.52      5.18 o 
  -1   4   1       11.88       14.33      1.92 o 
   0   4   1      518.37      505.18      8.08 o 
   1   4   1        0.51        0.64      1.32 o 
   2   4   1     2680.85     2929.70     28.88 o 
   3   4   1      977.20     1000.88     14.28 o 
   4   4   1     5812.12     5745.02     50.72 o 
   5   4   1      475.85      473.92      9.02 o 
   6   4   1     1130.46     1105.95     14.27 o 
   7   4   1       14.84       13.98      2.98 o 
   8   4   1       41.03       32.65      4.34 o 
   9   4   1       38.60       23.27      4.84 o 
  10   4   1        0.30       -0.78      3.65 o 
  11   4   1       35.38       25.96      6.67 o 
  12   4   1       16.32        4.18      6.12 o 
  13   4   1       22.33       21.50      7.47 o 
 -13   5   1       33.15       29.96      7.20 o 
 -12   5   1        1.15       -0.26      4.75 o 
 -11   5   1        9.27       12.77      4.77 o 
 -10   5   1       21.68       23.41      5.40 o 
  -9   5   1        2.13       12.85      4.67 o 
  -8   5   1        8.72       10.23      3.65 o 
  -7   5   1       35.35       25.43      4.46 o 
  -6   5   1        7.53        6.82      2.30 o 
  -5   5   1        0.41        3.45      1.82 o 
  -4   5   1       27.16       22.41      2.76 o 
  -3   5   1       81.51       75.66      3.90 o 
  -2   5   1      536.95      576.14      9.01 o 
  -1   5   1      662.95      718.20     12.09 o 
   0   5   1       10.98       10.50      1.99 o 
   1   5   1       29.20       29.96      3.16 o 
   2   5   1       13.79        9.89      2.22 o 
   3   5   1        5.31        5.47      2.02 o 
   4   5   1       28.51       28.38      5.05 o 
   5   5   1        0.40        3.04      1.91 o 
   6   5   1      571.11      553.18     10.93 o 
   7   5   1       30.67       33.98      5.01 o 
   8   5   1      128.45      103.61      7.08 o 
   9   5   1        0.54       -1.24      3.93 o 
  10   5   1       33.72       27.28      6.83 o 
  11   5   1        0.12        0.99      4.27 o 
  12   5   1        7.12        6.40      8.22 o 
 -12   6   1        1.39       -3.25      5.51 o 
 -11   6   1       44.48       51.00      8.40 o 
 -10   6   1       12.35       12.56      6.64 o 
  -9   6   1       11.36        4.47      4.01 o 
  -8   6   1       55.85       61.51      6.37 o 
  -7   6   1        5.31       -0.41      2.63 o 
  -6   6   1      186.02      157.14      6.40 o 
  -5   6   1       58.18       52.88      5.54 o 
  -4   6   1        0.31        0.21      1.92 o 
  -3   6   1       39.99       24.69      3.02 o 
  -2   6   1       34.82       32.55      3.38 o 
  -1   6   1        3.37        0.04      2.00 o 
   0   6   1      254.26      296.84     12.58 o 
   1   6   1      131.56      121.32      5.67 o 
   2   6   1       38.25       43.10      3.77 o 
   3   6   1        3.57        1.70      2.15 o 
   4   6   1      342.56      338.08     12.71 o 
   5   6   1       19.54       17.22      3.12 o 
   6   6   1      239.84      245.97      8.03 o 
   7   6   1       76.08       69.16      6.02 o 
   8   6   1      320.32      336.92     11.32 o 
   9   6   1       27.63       23.05      5.24 o 
  10   6   1        1.28       -0.38      4.49 o 
  11   6   1        2.32       -0.71      5.04 o 
 -11   7   1       16.18       10.93      7.39 o 
 -10   7   1       43.31       67.34     13.17 o 
  -9   7   1        2.10        0.07      5.15 o 
  -8   7   1        0.00        0.40      5.24 o 
  -7   7   1        0.49       -1.90      3.14 o 
  -6   7   1      113.39      125.26     12.27 o 
  -5   7   1        0.52       -1.23      3.58 o 
  -4   7   1       13.69        5.72      2.91 o 
  -3   7   1      306.37      321.65     13.17 o 
  -2   7   1        3.44        3.05      2.55 o 
  -1   7   1        3.01        1.44      2.96 o 
   0   7   1        5.69       -0.64      2.29 o 
   1   7   1       16.47       11.12      4.51 o 
   2   7   1       16.90       19.87      3.54 o 
   3   7   1      146.53      155.67     14.60 o 
   4   7   1        0.24        0.99      3.16 o 
   5   7   1        8.57        5.68      3.25 o 
   6   7   1       19.97       18.41      4.13 o 
   7   7   1       43.66       43.31      6.21 o 
   8   7   1       16.36       12.30      4.57 o 
   9   7   1        2.79        1.16      4.25 o 
  10   7   1        5.62       -0.69      5.66 o 
 -10   8   1       27.27       20.14     16.11 o 
  -9   8   1       35.92       51.66     12.15 o 
  -8   8   1        0.64       -2.41      7.59 o 
  -7   8   1       15.50       13.87      9.07 o 
  -6   8   1        8.60        5.10      4.68 o 
  -5   8   1      116.63      133.86     10.24 o 
  -4   8   1        7.92        6.73      4.30 o 
  -3   8   1      281.74      304.26     14.26 o 
  -2   8   1       27.70       32.52      8.00 o 
  -1   8   1        9.56        9.08      4.14 o 
   0   8   1       12.67        4.94      3.64 o 
   1   8   1       22.16       17.94      4.81 o 
   2   8   1       46.69       55.98      6.59 o 
   3   8   1        1.35       -2.68      3.50 o 
   4   8   1      144.31      161.94      8.72 o 
   5   8   1       24.93       16.15      4.35 o 
   6   8   1        5.92        3.07      4.74 o 
   7   8   1        2.12        2.18      5.01 o 
   8   8   1       34.47       29.98      6.40 o 
   9   8   1       25.28       20.01      9.74 o 
  -8   9   1       26.09       23.01     14.23 o 
  -7   9   1       54.87       74.17     25.91 o 
  -6   9   1        0.48        1.97      5.37 o 
  -5   9   1        4.60        2.51      5.00 o 
  -4   9   1        9.59        6.66      5.86 o 
  -3   9   1        5.48        0.91      4.96 o 
  -2   9   1        0.02        2.84      5.01 o 
  -1   9   1       79.58       59.07      8.34 o 
   0   9   1       52.21       63.02     13.64 o 
   1   9   1       80.68       90.38     10.09 o 
   2   9   1       59.23       69.50      8.15 o 
   3   9   1       28.24       16.61      5.16 o 
   4   9   1        6.39       10.65      5.56 o 
   5   9   1       19.29       17.25      5.64 o 
   6   9   1        0.01       -3.82      5.60 o 
   7   9   1        4.09        3.58     10.29 o 
  -5  10   1        0.64       -1.78      5.49 o 
  -4  10   1        0.02       -4.20      5.60 o 
  -3  10   1        2.45        7.05      5.84 o 
  -2  10   1       29.93       12.60      6.48 o 
  -1  10   1        6.45        8.86      6.12 o 
   0  10   1      177.45      245.72     15.21 o 
   1  10   1      140.37      143.63     18.56 o 
   2  10   1       14.17       10.61      6.31 o 
   3  10   1       78.50       76.27     10.31 o 
   4  10   1        4.16        2.44      7.98 o 
 -15   0   2        0.46        2.30      8.16 o 
 -14   0   2       57.40       57.44     15.30 o 
 -13   0   2       13.51       17.72      7.84 o 
 -12   0   2       23.73       16.78      7.21 o 
 -11   0   2       47.35       46.10     12.22 o 
 -10   0   2      130.27      130.60     11.62 o 
  -9   0   2      366.08      347.76     37.05 o 
  -8   0   2      174.96      164.91     10.39 o 
  -7   0   2      789.56      933.61     15.99 o 
  -6   0   2       14.05       11.89      2.50 o 
  -5   0   2      265.74      274.93      6.99 o 
  -4   0   2     2859.23     2869.27     35.54 o 
  -3   0   2     1763.41     1750.85     22.87 o 
  -2   0   2     2812.94     2675.80     31.09 o 
  -1   0   2      608.16      641.76      8.44 o 
   0   0   2        5.02       -1.06      1.06 o 
   1   0   2      162.56      156.06      4.66 o 
   2   0   2     3851.08     3853.36     44.59 o 
   3   0   2       73.59       77.21      6.68 o 
   4   0   2     1162.27     1186.40     47.66 o 
   5   0   2       59.55       38.79      7.79 o 
   6   0   2      458.34      418.65     17.28 o 
   7   0   2       44.58       36.27      6.99 o 
   8   0   2      309.96      349.16     17.93 o 
   9   0   2        3.71       -1.64      4.54 o 
  10   0   2      257.34      268.98     18.93 o 
  11   0   2      309.68      319.70     21.60 o 
  12   0   2        8.26        7.34      9.26 o 
  13   0   2        6.54       -5.97      8.12 o 
  14   0   2        6.78       -8.94      8.94 o 
 -15   1   2      104.86      117.76     12.21 o 
 -14   1   2       32.97       34.33      7.46 o 
 -13   1   2       15.81       10.81      4.64 o 
 -12   1   2        1.47       -0.67      3.65 o 
 -11   1   2       77.62       65.04     10.35 o 
 -10   1   2       14.31       11.67      3.32 o 
  -9   1   2        2.28        3.39      2.30 o 
  -8   1   2       60.26       42.79      4.05 o 
  -7   1   2       46.46       36.69      3.14 o 
  -6   1   2      166.41      177.63      5.76 o 
  -5   1   2      282.95      310.22      7.46 o 
  -4   1   2      362.66      359.55      6.16 o 
  -3   1   2     2190.11     2223.08     19.86 o 
  -2   1   2      861.43      839.09     10.16 o 
  -1   1   2      110.60      116.30      3.38 o 
   0   1   2      797.78      829.57      8.89 o 
   1   1   2     4050.68     3960.90     34.95 o 
   2   1   2     1522.25     1560.95     15.52 o 
   3   1   2       21.75       21.52      2.70 o 
   4   1   2      477.84      451.42      7.36 o 
   5   1   2        1.26       -0.63      1.67 o 
   6   1   2       18.88       12.83      2.62 o 
   7   1   2        0.36       -2.43      2.43 o 
   8   1   2        0.60       -0.53      2.92 o 
   9   1   2       38.84       43.56      7.65 o 
  10   1   2       65.99       81.43      8.58 o 
  11   1   2      105.31      116.43     11.16 o 
  12   1   2        1.50       -3.00      4.71 o 
  13   1   2       20.59       27.09      8.64 o 
 -15   2   2        4.10        0.99      5.91 o 
 -14   2   2       45.49       27.70      7.27 o 
 -13   2   2       47.79       30.65      8.10 o 
 -12   2   2      135.11      145.78      9.75 o 
 -11   2   2      110.15      130.06      8.46 o 
 -10   2   2      263.82      226.54      9.61 o 
  -9   2   2        0.98        2.22      2.80 o 
  -8   2   2      335.39      384.03      8.01 o 
  -7   2   2      194.62      197.91      5.90 o 
  -6   2   2       10.01        8.09      1.91 o 
  -5   2   2       74.46       52.38      3.31 o 
  -4   2   2     1453.46     1398.11     15.83 o 
  -3   2   2     1447.17     1518.96     16.03 o 
  -2   2   2      323.97      288.20      5.80 o 
  -1   2   2        9.35        7.43      1.98 o 
   0   2   2    16628.07    17148.07    116.25 o 
   1   2   2      446.09      415.05      5.77 o 
   2   2   2     4790.28     4820.40     39.85 o 
   3   2   2      694.45      608.71      8.08 o 
   4   2   2       74.60       65.23      2.89 o 
   5   2   2      109.19      101.63      3.87 o 
   6   2   2        0.15       -0.11      1.29 o 
   7   2   2        6.53        4.55      3.37 o 
   8   2   2       19.36       11.66      4.11 o 
   9   2   2      126.65      126.10      9.41 o 
  10   2   2        0.09       -1.75      3.68 o 
  11   2   2       64.71       83.35      9.73 o 
  12   2   2        2.62        7.03      5.29 o 
  13   2   2       14.76       10.35      6.26 o 
 -15   3   2        7.26        5.48      6.39 o 
 -14   3   2        1.34       -2.60      5.08 o 
 -13   3   2       58.77       64.94      7.94 o 
 -12   3   2        7.51        1.34      3.99 o 
 -11   3   2        0.02       -0.47      3.26 o 
 -10   3   2        2.78        3.17      3.12 o 
  -9   3   2        0.32       -1.06      2.16 o 
  -8   3   2        2.91        5.05      2.13 o 
  -7   3   2      342.26      325.77      8.00 o 
  -6   3   2     1070.07     1200.11     16.13 o 
  -5   3   2      160.55      210.50      7.24 o 
  -4   3   2      935.23      991.79     13.01 o 
  -3   3   2     1871.80     1914.91     19.48 o 
  -2   3   2        0.97       -0.50      0.94 o 
  -1   3   2      119.99      127.83      3.15 o 
   0   3   2        2.28        5.65      1.19 o 
   1   3   2      696.56      802.34     10.83 o 
   2   3   2        4.26        3.72      1.43 o 
   3   3   2     3659.52     3693.84     29.66 o 
   4   3   2      249.15      261.65      5.85 o 
   5   3   2      113.28      111.96      6.04 o 
   6   3   2       49.58       57.45      3.41 o 
   7   3   2      286.26      266.13      8.53 o 
   8   3   2        7.04       12.75      4.35 o 
   9   3   2       34.92       18.41      8.14 o 
  10   3   2        0.46       -2.59      3.69 o 
  11   3   2       48.31       46.91      7.51 o 
  12   3   2        0.27       -2.10      5.04 o 
  13   3   2        0.39       -0.21      5.96 o 
 -14   4   2        0.63       -4.80      4.80 o 
 -13   4   2        4.59       -3.23      4.33 o 
 -12   4   2       13.49        8.97      4.67 o 
 -11   4   2      248.71      261.50     17.24 o 
 -10   4   2       12.06       11.46      4.06 o 
  -9   4   2        1.72       -0.31      2.75 o 
  -8   4   2        9.28        6.14      2.71 o 
  -7   4   2      117.00      115.64      5.41 o 
  -6   4   2      375.20      401.30      9.19 o 
  -5   4   2       15.80       20.80      2.66 o 
  -4   4   2      471.44      395.70      8.02 o 
  -3   4   2       16.15        9.62      1.79 o 
  -2   4   2      245.63      295.79      5.36 o 
  -1   4   2      188.46      198.73      4.61 o 
   0   4   2        0.41       -0.27      1.42 o 
   1   4   2     1328.71     1257.01     21.29 o 
   2   4   2     3489.17     3819.58     33.33 o 
   3   4   2      290.20      298.60      7.80 o 
   4   4   2     1619.54     1618.66     18.83 o 
   5   4   2      396.63      390.12      8.03 o 
   6   4   2       54.60       63.28      4.15 o 
   7   4   2      158.79      125.32      9.37 o 
   8   4   2      328.81      316.01     14.23 o 
   9   4   2        0.64        2.23      3.72 o 
  10   4   2       11.60       21.48      6.10 o 
  11   4   2       30.54       14.82      9.96 o 
  12   4   2       47.99       58.59     11.53 o 
 -14   5   2        3.95        6.08      6.32 o 
 -13   5   2        2.95        0.40      5.24 o 
 -12   5   2        3.14        2.50      4.63 o 
 -11   5   2       31.95       17.20      5.23 o 
 -10   5   2       48.07       53.82      7.75 o 
  -9   5   2       44.93       26.63      4.83 o 
  -8   5   2       29.03       31.16      4.76 o 
  -7   5   2       20.56       14.12      3.42 o 
  -6   5   2       89.31       88.77      5.81 o 
  -5   5   2      781.17      790.66     12.59 o 
  -4   5   2      520.80      615.63     10.58 o 
  -3   5   2      148.49      168.63      5.67 o 
  -2   5   2      329.31      383.98      6.95 o 
  -1   5   2      361.78      401.00      7.91 o 
   0   5   2        1.45       -0.61      1.18 o 
   1   5   2       58.57       64.20      3.99 o 
   2   5   2       41.02       43.15      5.66 o 
   3   5   2        4.21        3.48      1.86 o 
   4   5   2       35.25       32.29      3.36 o 
   5   5   2     1325.81     1331.61     16.92 o 
   6   5   2        0.76        0.39      2.04 o 
   7   5   2      242.23      209.07      7.90 o 
   8   5   2       22.20       24.29      4.83 o 
   9   5   2        7.90        2.85      4.01 o 
  10   5   2       35.51       39.67      6.63 o 
  11   5   2        6.99       10.37      6.55 o 
  12   5   2        5.59        3.06      6.13 o 
 -13   6   2        2.16       -0.37      7.43 o 
 -12   6   2        2.33        9.83      7.17 o 
 -11   6   2       65.00       85.97     11.83 o 
 -10   6   2      113.11      159.83     17.15 o 
  -9   6   2        0.03       -5.03      7.42 o 
  -8   6   2       62.83       40.62      9.00 o 
  -7   6   2        1.04       -0.43      2.72 o 
  -6   6   2        1.94       -0.84      2.72 o 
  -5   6   2      182.43      196.51      8.13 o 
  -4   6   2        9.79        8.93      2.72 o 
  -3   6   2      169.58      190.11      7.30 o 
  -2   6   2      579.09      624.17     12.81 o 
  -1   6   2      612.07      681.72     13.47 o 
   0   6   2      242.98      241.15      7.33 o 
   1   6   2       11.53        9.95      2.55 o 
   2   6   2       84.78       76.30      5.23 o 
   3   6   2       41.68       34.74      5.45 o 
   4   6   2     1310.64     1386.11     23.95 o 
   5   6   2      237.01      249.47      8.97 o 
   6   6   2     2528.22     2692.56     32.06 o 
   7   6   2      141.11      105.83     13.93 o 
   8   6   2      174.37      171.11     11.55 o 
   9   6   2       16.70       13.68      5.82 o 
  10   6   2        3.23        7.16      5.93 o 
  11   6   2        0.01       -1.38      5.61 o 
 -12   7   2        2.58       -1.08      7.01 o 
 -11   7   2        1.09        1.51      9.40 o 
 -10   7   2        1.29       -1.63      6.42 o 
  -9   7   2        1.76        9.17      5.98 o 
  -8   7   2       26.69       33.68      9.53 o 
  -7   7   2       10.69       -0.14      4.00 o 
  -6   7   2       92.63       98.65      9.41 o 
  -5   7   2       46.12       57.52      6.29 o 
  -4   7   2      298.43      325.38     11.52 o 
  -3   7   2       12.33       26.56      4.18 o 
  -2   7   2       21.02       20.19      3.74 o 
  -1   7   2        0.25       -0.61      3.01 o 
   0   7   2      464.50      490.82     12.33 o 
   1   7   2        0.39        0.55      2.30 o 
   2   7   2      794.89      802.48     14.87 o 
   3   7   2        1.62        0.60      2.48 o 
   4   7   2      388.05      388.69     11.42 o 
   5   7   2      134.78      128.12      7.79 o 
   6   7   2       23.60       19.23      4.83 o 
   7   7   2       95.17       84.82      7.47 o 
   8   7   2       60.45       70.53      8.73 o 
   9   7   2      134.52      129.40     11.97 o 
  10   7   2       72.19       53.55     10.57 o 
 -10   8   2        4.66        7.52     14.77 o 
  -9   8   2       55.20       53.33     12.30 o 
  -8   8   2        3.40       -0.34      7.18 o 
  -7   8   2      103.83       81.87     11.08 o 
  -6   8   2       13.18       18.24      5.70 o 
  -5   8   2      219.73      261.01     13.30 o 
  -4   8   2        2.04        2.60      4.44 o 
  -3   8   2        5.63       -2.12      3.88 o 
  -2   8   2      191.75      224.39     12.28 o 
  -1   8   2       15.81       17.84      5.31 o 
   0   8   2      214.00      216.91     11.97 o 
   1   8   2       57.85       58.02      6.41 o 
   2   8   2      284.47      312.79     10.96 o 
   3   8   2      119.93       98.88      7.56 o 
   4   8   2        6.01       -0.16      3.51 o 
   5   8   2        8.26        2.88      3.69 o 
   6   8   2       88.89       69.78      8.79 o 
   7   8   2       26.66       26.80      5.94 o 
   8   8   2      131.12      116.99     17.20 o 
  -8   9   2       15.72       23.77     10.99 o 
  -7   9   2        4.50       11.70      7.28 o 
  -6   9   2       17.91        5.71      6.48 o 
  -5   9   2      116.80      125.90     11.93 o 
  -4   9   2       45.23       46.44     19.14 o 
  -3   9   2       17.44       15.87      8.80 o 
  -2   9   2        7.63        2.15      4.67 o 
  -1   9   2        9.04        9.78      5.47 o 
   0   9   2      101.92      102.37     10.32 o 
   1   9   2        4.31        0.29      4.88 o 
   2   9   2       18.58        4.18      5.47 o 
   3   9   2       10.00        4.80      5.39 o 
   4   9   2        0.78        2.31      4.55 o 
   5   9   2        4.14       -2.35      5.01 o 
   6   9   2        1.07       -4.24      5.34 o 
  -5  10   2        0.24       -1.52      5.83 o 
  -4  10   2       12.40       17.10      7.09 o 
  -3  10   2        0.03        2.96      5.89 o 
  -2  10   2        3.12        9.30      6.43 o 
  -1  10   2       36.16       39.99      8.50 o 
   0  10   2       71.91       75.25      9.90 o 
   1  10   2      131.13      179.42     14.27 o 
   2  10   2        1.42        3.25      5.70 o 
   3  10   2       22.83       13.73      6.24 o 
 -16   1   3       11.39        5.29      6.50 o 
 -15   1   3       17.69       16.36      6.50 o 
 -14   1   3        0.03       -0.68      4.24 o 
 -13   1   3      139.74      126.47     10.62 o 
 -12   1   3        6.25        0.40      3.76 o 
 -11   1   3      176.76      185.80      8.95 o 
 -10   1   3       81.74       91.96      8.20 o 
  -9   1   3       15.83       16.36      2.53 o 
  -8   1   3        0.28        0.90      1.43 o 
  -7   1   3      122.40      143.13      4.95 o 
  -6   1   3      522.92      532.14      9.04 o 
  -5   1   3      487.35      494.95      7.40 o 
  -4   1   3     1497.22     1490.46     14.15 o 
  -3   1   3     2242.09     2258.39     21.18 o 
  -2   1   3       22.34       27.12      2.26 o 
  -1   1   3     1510.35     1470.22     13.32 o 
   0   1   3     1956.08     1921.19     18.03 o 
   1   1   3        0.33       -1.04      1.04 o 
   2   1   3      204.83      184.88      4.63 o 
   3   1   3     1503.92     1516.85     16.59 o 
   4   1   3      360.97      343.43      7.79 o 
   5   1   3        0.00        1.17      1.24 o 
   6   1   3      108.91      114.37      9.92 o 
   7   1   3      169.99      180.72      9.49 o 
   8   1   3       24.95       17.72      7.44 o 
   9   1   3      334.67      363.48     14.82 o 
  10   1   3       10.31        7.11      4.74 o 
  11   1   3       58.70       36.28      7.53 o 
  12   1   3        3.13       -2.53      5.15 o 
  13   1   3        3.93       -4.29      5.74 o 
 -15   2   3        5.61       13.67      6.78 o 
 -14   2   3        9.11        8.74      5.30 o 
 -13   2   3        1.31        1.10      4.10 o 
 -12   2   3       12.02       11.04      4.59 o 
 -11   2   3       26.55       26.19      4.58 o 
 -10   2   3       86.50      102.58      6.95 o 
  -9   2   3        3.34        1.61      2.13 o 
  -8   2   3       65.76       57.06      5.20 o 
  -7   2   3       44.38       39.40      3.38 o 
  -6   2   3      292.77      288.40      7.39 o 
  -5   2   3        4.55       10.68      2.18 o 
  -4   2   3     1147.60     1199.63     13.64 o 
  -3   2   3     1522.65     1460.78     17.19 o 
  -2   2   3      815.34      758.30     15.93 o 
  -1   2   3     1698.62     1850.70     16.50 o 
   0   2   3     2017.01     2059.08     18.03 o 
   1   2   3     2538.40     2512.98     21.89 o 
   2   2   3       43.81       52.45      3.09 o 
   3   2   3     2180.74     2198.97     22.77 o 
   4   2   3      152.75      140.71      5.46 o 
   5   2   3        0.30       -0.55      1.47 o 
   6   2   3      107.41      104.30      5.62 o 
   7   2   3       80.94       72.55      7.07 o 
   8   2   3      154.69      201.27     10.74 o 
   9   2   3       21.00       19.18      5.17 o 
  10   2   3      131.19      152.52     15.04 o 
  11   2   3        1.96        1.78      4.96 o 
  12   2   3       17.54        8.36      5.97 o 
  13   2   3        9.13        8.74      6.04 o 
 -15   3   3        5.31        7.88      6.43 o 
 -14   3   3        0.04        1.55      4.41 o 
 -13   3   3        0.98       -1.95      3.90 o 
 -12   3   3      153.13      176.24     10.08 o 
 -11   3   3        0.84       -2.33      3.00 o 
 -10   3   3        4.96        5.47      3.56 o 
  -9   3   3       17.15       15.12      3.37 o 
  -8   3   3      156.27      164.82      7.85 o 
  -7   3   3       23.08       36.11      4.60 o 
  -6   3   3      658.84      710.97     11.68 o 
  -5   3   3     2048.80     2051.33     21.98 o 
  -4   3   3       78.26       67.28      3.12 o 
  -3   3   3      467.10      533.79      7.92 o 
  -2   3   3        3.37        0.02      1.37 o 
  -1   3   3      107.59      100.77      3.79 o 
   0   3   3      711.73      699.47      9.59 o 
   1   3   3      620.15      659.85      8.70 o 
   2   3   3       10.07       10.40      2.26 o 
   3   3   3       75.76       80.50      3.49 o 
   4   3   3       12.53        8.68      1.94 o 
   5   3   3       39.56       38.17      3.50 o 
   6   3   3       77.12       75.48     10.85 o 
   7   3   3       61.96       78.05      7.50 o 
   8   3   3      354.75      347.46     22.11 o 
   9   3   3        0.22        1.73      4.24 o 
  10   3   3       11.60        6.26      4.74 o 
  11   3   3        3.51       -0.79      4.97 o 
  12   3   3        0.08       -2.16      4.98 o 
 -14   4   3        4.26        7.60     10.10 o 
 -13   4   3        2.00       -1.90      4.52 o 
 -12   4   3       35.12       34.06      6.23 o 
 -11   4   3        0.01       -0.65      4.15 o 
 -10   4   3       97.73       69.84      6.60 o 
  -9   4   3       46.14       46.86      6.86 o 
  -8   4   3        5.74        4.86      2.29 o 
  -7   4   3       52.62       46.92      4.12 o 
  -6   4   3        2.04        2.21      1.66 o 
  -5   4   3       55.58       57.84      4.38 o 
  -4   4   3      232.43      245.44      8.65 o 
  -3   4   3      841.81      863.77     11.73 o 
  -2   4   3        1.29        1.41      1.51 o 
  -1   4   3       89.25       98.03      4.19 o 
   0   4   3      279.00      263.63      5.75 o 
   1   4   3       24.50       13.54      2.42 o 
   2   4   3      496.31      489.16      8.90 o 
   3   4   3      335.01      324.60      6.99 o 
   4   4   3       12.01       11.56      3.31 o 
   5   4   3       84.45       73.12      4.22 o 
   6   4   3      422.25      429.14     10.05 o 
   7   4   3      244.60      243.46     10.50 o 
   8   4   3       79.56       71.91      8.30 o 
   9   4   3       88.58       83.75      9.09 o 
  10   4   3       15.81       14.78      6.16 o 
  11   4   3       29.82       25.18      7.44 o 
  12   4   3        6.45        5.60      6.67 o 
 -14   5   3        7.50        6.04      6.21 o 
 -13   5   3       22.79       11.07      5.74 o 
 -12   5   3       15.33       11.31      6.96 o 
 -11   5   3      357.48      398.91     18.52 o 
 -10   5   3        4.04       -1.02      4.50 o 
  -9   5   3       75.85       81.02      7.59 o 
  -8   5   3       27.75       30.32      4.00 o 
  -7   5   3        2.45       -0.13      2.05 o 
  -6   5   3        0.14        0.32      1.90 o 
  -5   5   3      272.19      270.33      7.43 o 
  -4   5   3      349.75      417.58      8.82 o 
  -3   5   3      138.44      136.40      7.13 o 
  -2   5   3     1504.72     1599.65     20.77 o 
  -1   5   3      313.25      326.72      7.85 o 
   0   5   3      914.04      901.21     13.72 o 
   1   5   3        9.07        6.35      2.12 o 
   2   5   3        0.66       -0.36      1.86 o 
   3   5   3       98.79       98.63      7.10 o 
   4   5   3        0.67        1.53      1.71 o 
   5   5   3     1568.88     1565.12     19.03 o 
   6   5   3        2.31       -2.39      2.39 o 
   7   5   3      732.09      785.83     31.82 o 
   8   5   3        9.14       11.14      4.42 o 
   9   5   3        4.02       -3.35      4.26 o 
  10   5   3       11.16        3.25      5.38 o 
  11   5   3        0.59       -3.77      6.28 o 
 -13   6   3        2.32       11.07      7.67 o 
 -12   6   3       28.40       18.10      7.74 o 
 -11   6   3        2.98       -0.69      7.16 o 
 -10   6   3        9.77        5.67      5.63 o 
  -9   6   3      276.16      295.43     15.91 o 
  -8   6   3        0.24        0.89      3.52 o 
  -7   6   3        1.19       -2.19      3.14 o 
  -6   6   3      124.09      119.38      8.16 o 
  -5   6   3       27.81       24.83      4.75 o 
  -4   6   3      192.00      208.17      7.82 o 
  -3   6   3       18.74       17.72      3.62 o 
  -2   6   3      192.42      195.99      7.27 o 
  -1   6   3      161.12      169.85      7.28 o 
   0   6   3       55.41       65.80      6.00 o 
   1   6   3      142.86      135.39      7.80 o 
   2   6   3       82.58       83.57      5.86 o 
   3   6   3      236.34      252.53      8.79 o 
   4   6   3        5.70        4.64      2.55 o 
   5   6   3      910.71      908.80     15.88 o 
   6   6   3       70.55       53.79      6.94 o 
   7   6   3       10.00        1.23      4.09 o 
   8   6   3       26.55       41.60      7.08 o 
   9   6   3       17.53       20.65      6.35 o 
  10   6   3        5.37        2.09      7.02 o 
 -12   7   3       19.79       15.83     10.67 o 
 -11   7   3      127.47      128.78     18.26 o 
 -10   7   3        0.87       10.68      6.39 o 
  -9   7   3      128.04      150.64     27.40 o 
  -8   7   3        1.80        1.66      4.19 o 
  -7   7   3      186.78      175.48     10.97 o 
  -6   7   3      293.04      328.33     13.70 o 
  -5   7   3       10.65       10.29      4.66 o 
  -4   7   3       94.06      104.26      8.26 o 
  -3   7   3        8.28        3.07      3.20 o 
  -2   7   3      366.60      449.17     19.17 o 
  -1   7   3       64.82       63.16      6.33 o 
   0   7   3       47.52       58.76      5.06 o 
   1   7   3      225.99      249.48      9.69 o 
   2   7   3      159.47      169.14      9.10 o 
   3   7   3      228.61      234.87      9.33 o 
   4   7   3       25.25       27.96      4.99 o 
   5   7   3      243.06      278.39      9.48 o 
   6   7   3        2.82       -0.75      3.48 o 
   7   7   3      424.11      455.99     15.51 o 
   8   7   3       23.83       17.31      6.02 o 
   9   7   3       12.07        3.28      5.44 o 
 -10   8   3        6.41        8.61      7.05 o 
  -9   8   3       15.53       10.11      7.42 o 
  -8   8   3       86.55       81.99      9.55 o 
  -7   8   3       85.91       78.40     13.21 o 
  -6   8   3        0.88        0.30      4.11 o 
  -5   8   3       35.93       40.54      6.91 o 
  -4   8   3       12.23        7.69      4.51 o 
  -3   8   3       52.76       55.32      6.55 o 
  -2   8   3        0.06       -1.48      3.42 o 
  -1   8   3        3.24        0.27      3.49 o 
   0   8   3      151.96      174.61      9.83 o 
   1   8   3      241.43      266.22     10.64 o 
   2   8   3      234.53      242.49     10.10 o 
   3   8   3      283.29      304.98     11.28 o 
   4   8   3        9.47        3.26      3.29 o 
   5   8   3       21.73       18.38      4.69 o 
   6   8   3      131.57      105.28      9.45 o 
   7   8   3        0.08       -2.80      4.70 o 
   8   8   3      121.63      141.41     25.28 o 
  -8   9   3       44.44       45.74     23.36 o 
  -7   9   3        0.07       -5.87      5.87 o 
  -6   9   3       29.13       27.82     10.91 o 
  -5   9   3       46.49       47.80     10.16 o 
  -4   9   3        9.30        4.42      5.69 o 
  -3   9   3       12.16       10.12      5.90 o 
  -2   9   3       27.40       34.05      7.41 o 
  -1   9   3      215.17      217.98     13.29 o 
   0   9   3        0.22       -4.49      4.61 o 
   1   9   3      353.85      377.73     25.49 o 
   2   9   3       51.61       38.97      7.51 o 
   3   9   3        3.61        1.20      4.93 o 
   4   9   3        8.55        9.27      5.77 o 
   5   9   3        8.84        4.46      5.91 o 
   6   9   3        9.77       15.10      7.74 o 
  -5  10   3        3.14        3.67      7.07 o 
  -4  10   3       17.52        4.57      6.73 o 
  -3  10   3        0.56       -0.99      5.86 o 
  -2  10   3       62.75       57.14      9.78 o 
  -1  10   3       32.81       26.21      8.24 o 
   0  10   3        0.06       -5.58      5.58 o 
   1  10   3        3.50        0.82      5.91 o 
   2  10   3        5.51        1.97      6.18 o 
   3  10   3       16.97       17.86     10.42 o 
 -16   0   4        2.61        3.67      8.97 o 
 -15   0   4       63.63       59.88     12.11 o 
 -14   0   4        1.08        1.98      6.36 o 
 -13   0   4       26.10       31.14      9.59 o 
 -12   0   4      478.30      567.30     33.83 o 
 -11   0   4        3.08        0.43      4.35 o 
 -10   0   4        9.41        9.81      5.34 o 
  -9   0   4       46.10       48.62      6.73 o 
  -8   0   4      333.21      320.71     11.08 o 
  -7   0   4      244.17      221.94     10.97 o 
  -6   0   4      128.89      113.71      7.56 o 
  -5   0   4      789.76      770.81     23.29 o 
  -4   0   4      588.80      612.68     12.55 o 
  -3   0   4      351.71      319.49     10.89 o 
  -2   0   4      466.60      512.86     11.14 o 
  -1   0   4     4697.87     4706.04     54.81 o 
   0   0   4     3221.36     3069.06     38.85 o 
   1   0   4     2200.47     2182.02     30.49 o 
   2   0   4      171.89      158.58      8.76 o 
   3   0   4      115.75      147.23     19.14 o 
   4   0   4       83.13       78.28      8.06 o 
   5   0   4       28.56       26.47      4.40 o 
   6   0   4      481.84      473.31     32.08 o 
   7   0   4       23.92       26.72     12.22 o 
   8   0   4      132.38      109.03     13.93 o 
   9   0   4      125.82      168.06     16.24 o 
  10   0   4      628.65      747.23     76.38 o 
  11   0   4      236.50      236.55     20.95 o 
  12   0   4      152.80      185.83     20.34 o 
 -16   1   4       19.21       35.44      7.98 o 
 -15   1   4       14.87       14.79      6.18 o 
 -14   1   4       97.44      117.86     11.20 o 
 -13   1   4       32.77       20.25      5.42 o 
 -12   1   4       34.23       33.08      5.79 o 
 -11   1   4      102.08      115.02      7.35 o 
 -10   1   4       24.66       20.35      3.40 o 
  -9   1   4        0.53        2.00      1.67 o 
  -8   1   4       41.82       40.67      5.26 o 
  -7   1   4      104.07      119.42      5.07 o 
  -6   1   4       74.76       62.75      3.88 o 
  -5   1   4        7.36        9.48      1.47 o 
  -4   1   4      489.15      471.75      7.53 o 
  -3   1   4     1306.18     1216.30     13.23 o 
  -2   1   4      427.34      404.14      6.03 o 
  -1   1   4       15.76       16.55      1.79 o 
   0   1   4     1944.75     1970.11     19.56 o 
   1   1   4       34.52       23.15      2.78 o 
   2   1   4     2148.24     2224.54     22.59 o 
   3   1   4      125.70      124.77      4.52 o 
   4   1   4      446.76      430.11      8.25 o 
   5   1   4      202.01      221.68      7.39 o 
   6   1   4       68.33       67.95      6.59 o 
   7   1   4       33.03       38.55      6.89 o 
   8   1   4       67.22       77.78      8.06 o 
   9   1   4       22.76        9.97      5.58 o 
  10   1   4       34.00       49.57      8.87 o 
  11   1   4      279.18      301.95     15.97 o 
  12   1   4        5.09        4.77      6.04 o 
 -16   2   4       22.35       12.13      6.80 o 
 -15   2   4        7.56        0.48      5.11 o 
 -14   2   4        0.06       -3.88      3.89 o 
 -13   2   4      216.13      248.63     11.56 o 
 -12   2   4       16.68        9.54      3.85 o 
 -11   2   4        8.39        7.86      3.43 o 
 -10   2   4       65.17       62.32      5.02 o 
  -9   2   4       55.87       63.90      4.49 o 
  -8   2   4      229.93      216.64      9.33 o 
  -7   2   4      244.31      239.10      6.53 o 
  -6   2   4     1374.94     1396.82     16.87 o 
  -5   2   4      566.48      506.81      8.88 o 
  -4   2   4     1643.35     1682.10     20.23 o 
  -3   2   4      200.08      179.57      5.05 o 
  -2   2   4        2.89        2.12      1.14 o 
  -1   2   4       27.80       39.82      2.23 o 
   0   2   4     4504.63     4649.94     44.73 o 
   1   2   4      865.15      852.11     12.61 o 
   2   2   4      547.43      555.83      9.61 o 
   3   2   4       54.25       60.61      3.65 o 
   4   2   4      237.81      217.15      7.04 o 
   5   2   4       38.01       47.67      3.94 o 
   6   2   4        2.17        0.54      2.74 o 
   7   2   4      748.10      744.15     25.69 o 
   8   2   4      726.42      805.54     22.59 o 
   9   2   4      253.77      244.17     13.13 o 
  10   2   4       32.39       37.38      6.97 o 
  11   2   4       57.06       63.74      9.10 o 
  12   2   4        5.42        3.86      5.95 o 
 -15   3   4       52.57       59.86     11.55 o 
 -14   3   4        6.97       -2.98      4.74 o 
 -13   3   4       69.10       74.72     10.45 o 
 -12   3   4        5.20        8.23      4.04 o 
 -11   3   4      109.79       93.09      7.49 o 
 -10   3   4       69.56       71.69      6.31 o 
  -9   3   4      137.13      124.95      5.91 o 
  -8   3   4      117.21      107.36      5.38 o 
  -7   3   4      660.77      620.61     11.20 o 
  -6   3   4       27.80       27.59      2.94 o 
  -5   3   4      142.53      137.47      4.46 o 
  -4   3   4       67.95       70.30      2.89 o 
  -3   3   4      178.09      152.95     10.55 o 
  -2   3   4      657.68      677.35      8.49 o 
  -1   3   4        0.93        1.80      1.90 o 
   0   3   4     1006.55     1156.19     12.93 o 
   1   3   4      263.27      237.33      5.56 o 
   2   3   4       38.01       43.48      3.48 o 
   3   3   4      163.77      161.46      6.50 o 
   4   3   4        2.26        5.26      2.01 o 
   5   3   4       94.42       91.32      6.34 o 
   6   3   4       58.48       47.36      5.06 o 
   7   3   4      386.58      398.27     14.72 o 
   8   3   4       21.18       10.47      5.04 o 
   9   3   4       99.55      120.54     10.91 o 
  10   3   4        0.11       -0.67      4.94 o 
  11   3   4       15.78       12.36      6.15 o 
  12   3   4        0.47        0.74      6.06 o 
 -15   4   4       54.40       36.89      8.15 o 
 -14   4   4        0.83       -0.25      4.92 o 
 -13   4   4       16.45       31.51      6.90 o 
 -12   4   4      162.81      182.19     11.66 o 
 -11   4   4       25.81       25.09      6.35 o 
 -10   4   4       53.34       38.19      5.76 o 
  -9   4   4       85.64       98.74      7.00 o 
  -8   4   4      249.47      267.43      9.01 o 
  -7   4   4      165.81      179.70      6.36 o 
  -6   4   4      214.94      217.09      8.68 o 
  -5   4   4      195.74      170.16      5.24 o 
  -4   4   4       74.98       86.39      3.42 o 
  -3   4   4       25.93       22.63      2.68 o 
  -2   4   4      506.40      558.37     10.77 o 
  -1   4   4       10.65       12.15      2.33 o 
   0   4   4      605.66      608.88      8.46 o 
   1   4   4        0.97        1.75      1.37 o 
   2   4   4      294.42      305.32      7.09 o 
   3   4   4       15.20        9.82      2.19 o 
   4   4   4      181.31      165.54      6.31 o 
   5   4   4       54.72       54.32      5.23 o 
   6   4   4      244.67      272.59     10.18 o 
   7   4   4      955.50      994.89     23.67 o 
   8   4   4        1.44        1.14      4.04 o 
   9   4   4       11.85        0.29      6.32 o 
  10   4   4        0.88       -0.27      5.20 o 
  11   4   4        1.40       -4.88      5.74 o 
 -14   5   4       28.01       19.39     12.67 o 
 -13   5   4        9.82       -1.12      5.96 o 
 -12   5   4       26.18       33.30     10.05 o 
 -11   5   4      101.19      120.30     16.49 o 
 -10   5   4        0.24       -4.13      4.13 o 
  -9   5   4      264.13      270.60     11.83 o 
  -8   5   4       38.36       38.78      5.61 o 
  -7   5   4        0.38        0.71      2.83 o 
  -6   5   4        0.14       -1.21      2.40 o 
  -5   5   4      181.91      170.54      9.04 o 
  -4   5   4       89.68       74.88      8.91 o 
  -3   5   4      546.94      605.96     12.38 o 
  -2   5   4      341.81      386.73      9.78 o 
  -1   5   4      174.39      153.80      9.85 o 
   0   5   4       24.82       24.83      3.30 o 
   1   5   4      178.49      166.13      7.21 o 
   2   5   4      332.11      319.25      8.77 o 
   3   5   4        3.60        0.32      2.17 o 
   4   5   4      103.12      105.96      6.10 o 
   5   5   4      303.46      295.75     10.78 o 
   6   5   4       67.13       84.32      7.76 o 
   7   5   4       95.38       81.64     12.21 o 
   8   5   4        0.13        0.65      5.39 o 
   9   5   4        0.02       -5.71      5.79 o 
  10   5   4        3.60       -2.57      6.30 o 
 -13   6   4        2.35       -4.08      6.15 o 
 -12   6   4       49.10       53.70     11.96 o 
 -11   6   4       10.82       -1.67      6.55 o 
 -10   6   4      355.22      402.46     19.04 o 
  -9   6   4       10.99       11.91      4.51 o 
  -8   6   4       42.35       44.60      6.98 o 
  -7   6   4        0.01       -2.27      3.16 o 
  -6   6   4      202.73      229.78     16.39 o 
  -5   6   4        7.09        7.43      3.75 o 
  -4   6   4        6.24        3.44      3.07 o 
  -3   6   4        6.30        7.91      3.57 o 
  -2   6   4       85.89      104.14      9.30 o 
  -1   6   4      395.07      413.88     11.29 o 
   0   6   4       45.41       48.33      4.32 o 
   1   6   4       71.40       67.90      5.16 o 
   2   6   4       58.67       69.27      5.52 o 
   3   6   4       45.57       38.71      4.14 o 
   4   6   4      104.11       90.75      6.12 o 
   5   6   4       19.89       15.05      4.28 o 
   6   6   4      100.65      105.90      8.18 o 
   7   6   4       12.83       13.28      5.56 o 
   8   6   4        0.49        2.62      7.89 o 
   9   6   4       11.70       21.18      7.21 o 
  10   6   4        0.17       -2.74      6.85 o 
 -12   7   4        0.35       -3.02      7.76 o 
 -11   7   4        4.87       -2.67      7.67 o 
 -10   7   4       55.22       45.60     11.21 o 
  -9   7   4       14.19       14.62      5.74 o 
  -8   7   4      114.05      116.70     10.67 o 
  -7   7   4        9.42        4.42      4.47 o 
  -6   7   4        2.31       -0.76      3.73 o 
  -5   7   4      223.54      234.89     11.93 o 
  -4   7   4        0.68       -1.88      3.28 o 
  -3   7   4      297.16      321.42     18.12 o 
  -2   7   4        0.03        0.69      3.58 o 
  -1   7   4       83.31       88.58     11.25 o 
   0   7   4        3.18        0.59      2.90 o 
   1   7   4       46.39       42.14      4.98 o 
   2   7   4       28.50       18.14      4.14 o 
   3   7   4      232.61      236.96     13.30 o 
   4   7   4       23.69       24.64      4.56 o 
   5   7   4       29.93       20.71      5.15 o 
   6   7   4        7.99        6.54      4.53 o 
   7   7   4       53.91       45.73      7.58 o 
   8   7   4       18.61        2.84      5.67 o 
 -10   8   4       23.75       34.32      9.40 o 
  -9   8   4        1.47        6.44      6.69 o 
  -8   8   4       82.10       86.81     10.15 o 
  -7   8   4        0.18       -0.93      4.47 o 
  -6   8   4      221.64      239.08     13.15 o 
  -5   8   4        2.43        4.63      4.41 o 
  -4   8   4       41.52       47.37      8.76 o 
  -3   8   4       15.89       12.92      5.19 o 
  -2   8   4       77.27       72.60      7.59 o 
  -1   8   4       22.79       13.85      4.48 o 
   0   8   4        9.82        1.04      3.85 o 
   1   8   4      107.12      126.28     14.71 o 
   2   8   4       18.42       13.47      5.78 o 
   3   8   4       18.88       19.29      4.62 o 
   4   8   4       39.09       35.61      5.65 o 
   5   8   4        0.92        0.87      4.90 o 
   6   8   4      101.81      124.46     38.38 o 
   7   8   4       16.51        9.13     10.74 o 
  -8   9   4        2.22       -0.86      6.93 o 
  -7   9   4       17.85       28.39      9.15 o 
  -6   9   4        1.90        3.58      5.90 o 
  -5   9   4        1.23        1.83      5.85 o 
  -4   9   4       22.86       15.98      7.59 o 
  -3   9   4        0.00        3.04      5.76 o 
  -2   9   4       22.74       20.30      7.35 o 
  -1   9   4       10.77       13.78      9.15 o 
   0   9   4       53.55       42.18     10.54 o 
   1   9   4        6.94        3.47      5.40 o 
   2   9   4       83.42       85.71      8.75 o 
   3   9   4        2.54        2.86      5.69 o 
   4   9   4       33.60       23.68      8.18 o 
   5   9   4        2.11        8.54      7.42 o 
  -5  10   4       39.98       42.78     10.46 o 
  -4  10   4       13.74       -1.85      6.68 o 
  -3  10   4       14.63       13.93     12.60 o 
  -2  10   4        3.53       11.91      8.07 o 
  -1  10   4        6.62       10.49      8.41 o 
   0  10   4        0.43       -2.88      6.17 o 
   1  10   4        0.04       -0.07      6.05 o 
 -16   1   5       85.38       90.42     11.20 o 
 -15   1   5       52.14       40.91      9.60 o 
 -14   1   5       19.20        9.94      4.94 o 
 -13   1   5      408.09      442.75     21.40 o 
 -12   1   5       43.48       33.07      6.90 o 
 -11   1   5      447.34      454.82     12.88 o 
 -10   1   5        2.53       -0.48      1.79 o 
  -9   1   5      167.05      166.99      5.69 o 
  -8   1   5       15.19       15.67      2.39 o 
  -7   1   5      233.20      260.46      8.36 o 
  -6   1   5     1579.44     1642.86     17.10 o 
  -5   1   5     2691.03     2627.00     25.69 o 
  -4   1   5      162.88      190.09      6.24 o 
  -3   1   5     2428.42     2484.38     35.42 o 
  -2   1   5      868.16      831.12      9.58 o 
  -1   1   5       45.48       51.11      2.87 o 
   0   1   5     1439.87     1325.47     15.73 o 
   1   1   5      130.94      118.17      4.47 o 
   2   1   5     2226.65     2456.98     25.54 o 
   3   1   5      303.93      336.00      9.37 o 
   4   1   5      406.52      472.08      9.47 o 
   5   1   5      412.16      456.61     21.30 o 
   6   1   5      408.65      402.23     14.01 o 
   7   1   5       93.08       88.73      8.74 o 
   8   1   5        0.51       -1.74      3.88 o 
   9   1   5      308.69      332.13     15.55 o 
  10   1   5        5.87        2.56      5.75 o 
  11   1   5      115.69      118.05     12.14 o 
 -16   2   5        6.59        5.38      8.54 o 
 -15   2   5      261.80      268.93     17.15 o 
 -14   2   5       16.38       17.69      5.26 o 
 -13   2   5      202.53      203.23     10.39 o 
 -12   2   5       11.92        8.83      3.91 o 
 -11   2   5      143.05      147.24      7.99 o 
 -10   2   5        1.44        1.87      2.22 o 
  -9   2   5      403.87      398.01     10.97 o 
  -8   2   5        1.12        1.82      1.63 o 
  -7   2   5      344.48      347.54      8.50 o 
  -6   2   5     1073.68     1134.41     14.75 o 
  -5   2   5      101.67      111.55      7.38 o 
  -4   2   5       84.10       84.51      4.08 o 
  -3   2   5        6.85        6.90      3.02 o 
  -2   2   5        0.15        1.95      1.10 o 
  -1   2   5     1502.65     1468.29     15.51 o 
   0   2   5       61.63       63.97      3.35 o 
   1   2   5      101.97      102.41      5.80 o 
   2   2   5      447.76      415.90      8.70 o 
   3   2   5     1186.88     1206.83     16.61 o 
   4   2   5        0.90       -0.75      1.71 o 
   5   2   5        1.34        0.94      2.15 o 
   6   2   5        2.51        8.02      3.64 o 
   7   2   5      377.89      377.40     25.25 o 
   8   2   5       22.75       27.81      6.05 o 
   9   2   5      248.72      283.51     14.56 o 
  10   2   5       89.96       84.75     10.06 o 
  11   2   5        4.19       -2.43      5.31 o 
 -15   3   5        7.85        8.81      5.79 o 
 -14   3   5      222.92      259.04     14.49 o 
 -13   3   5       51.81       61.13      8.45 o 
 -12   3   5       79.47       90.04      8.92 o 
 -11   3   5       12.40        9.96      4.26 o 
 -10   3   5      340.23      341.10      9.69 o 
  -9   3   5       56.04       67.84      4.99 o 
  -8   3   5       48.36       51.01      4.15 o 
  -7   3   5       87.92       88.81      5.92 o 
  -6   3   5        0.15       -1.24      1.33 o 
  -5   3   5       55.98       34.55      3.49 o 
  -4   3   5      222.89      209.60      6.03 o 
  -3   3   5       32.76       31.07      4.21 o 
  -2   3   5      205.83      251.77      8.46 o 
  -1   3   5     1314.22     1372.13     14.97 o 
   0   3   5     2054.53     2204.86     23.31 o 
   1   3   5       69.15       74.20      4.22 o 
   2   3   5      270.16      303.61      8.29 o 
   3   3   5      132.63      119.89      5.31 o 
   4   3   5        2.56       -0.40      2.01 o 
   5   3   5       53.59       43.66      4.92 o 
   6   3   5      442.96      454.40     15.43 o 
   7   3   5      456.86      530.11     35.65 o 
   8   3   5      233.69      230.14     17.23 o 
   9   3   5       28.78       24.08      6.67 o 
  10   3   5        0.80        1.28      5.10 o 
  11   3   5        9.67        1.36      6.34 o 
 -15   4   5       36.38       33.25      8.18 o 
 -14   4   5       55.79       40.30      7.82 o 
 -13   4   5        4.02        2.38      4.92 o 
 -12   4   5       69.99       64.60      9.69 o 
 -11   4   5        0.13       -1.92      3.65 o 
 -10   4   5      112.39      113.87      7.41 o 
  -9   4   5      137.82      128.25      7.26 o 
  -8   4   5      317.78      305.01      9.80 o 
  -7   4   5       35.61       44.64      4.47 o 
  -6   4   5      600.93      610.67     12.74 o 
  -5   4   5       44.55       50.22      3.79 o 
  -4   4   5      777.17      724.56     17.98 o 
  -3   4   5      144.71      152.11      7.57 o 
  -2   4   5       11.90       16.62      2.39 o 
  -1   4   5       35.24       29.26      4.96 o 
   0   4   5      119.73      106.65      4.44 o 
   1   4   5       70.84       66.27      4.76 o 
   2   4   5       20.62       13.12      2.87 o 
   3   4   5      321.46      347.72      9.45 o 
   4   4   5        3.64        3.16      2.29 o 
   5   4   5       77.31       68.44      6.19 o 
   6   4   5       22.30       15.58      5.00 o 
   7   4   5       16.63       13.26      5.31 o 
   8   4   5        5.82        8.74      5.43 o 
   9   4   5        0.51       -3.39      4.73 o 
  10   4   5        1.61        1.26      5.97 o 
 -14   5   5       82.75       98.12     14.52 o 
 -13   5   5        0.13        8.02      8.12 o 
 -12   5   5       16.20        6.18     11.81 o 
 -11   5   5       12.23       18.04      6.37 o 
 -10   5   5       42.13       57.33     11.68 o 
  -9   5   5       15.18       22.42      6.08 o 
  -8   5   5      116.88      107.55      8.26 o 
  -7   5   5        0.28        0.13      2.91 o 
  -6   5   5       31.81       24.83      4.86 o 
  -5   5   5       97.86      124.54     10.98 o 
  -4   5   5       35.01       27.80      4.64 o 
  -3   5   5      382.24      366.97     18.68 o 
  -2   5   5       21.40       11.93      3.48 o 
  -1   5   5       27.25       25.68      4.12 o 
   0   5   5        0.30        2.72      1.96 o 
   1   5   5        0.48        1.64      2.26 o 
   2   5   5       51.55       60.40      4.97 o 
   3   5   5      146.27      142.30      6.84 o 
   4   5   5        7.03        2.40      2.99 o 
   5   5   5        8.68       15.43      4.55 o 
   6   5   5       28.94       33.55      7.46 o 
   7   5   5        0.60        0.10      6.62 o 
   8   5   5        1.84       -0.20      6.06 o 
   9   5   5        0.62       -4.39      7.49 o 
  10   5   5        0.47        6.84      7.65 o 
 -13   6   5        9.78        7.99      9.02 o 
 -12   6   5       44.46       62.30     13.76 o 
 -11   6   5        8.63        5.89      6.16 o 
 -10   6   5        0.12       -1.59      4.81 o 
  -9   6   5       28.13       28.94      6.59 o 
  -8   6   5       93.30       74.44      8.35 o 
  -7   6   5        4.04        3.58      3.80 o 
  -6   6   5       11.09       12.76      4.21 o 
  -5   6   5        0.65       -0.30      3.21 o 
  -4   6   5        4.29        0.37      2.93 o 
  -3   6   5       28.62       29.27      5.74 o 
  -2   6   5        6.36        5.42      3.61 o 
  -1   6   5       53.28       49.35      5.46 o 
   0   6   5        5.18        8.26      3.36 o 
   1   6   5       20.70       24.50      4.55 o 
   2   6   5        7.13        7.90      3.30 o 
   3   6   5       22.91       27.15      4.75 o 
   4   6   5       44.30       42.35      5.50 o 
   5   6   5        6.99       -0.05      3.36 o 
   6   6   5        2.03        2.46      5.96 o 
   7   6   5       37.96       32.51      9.05 o 
   8   6   5        8.26        3.33      6.57 o 
   9   6   5       21.33       15.60      7.73 o 
 -12   7   5        1.79        1.51     10.20 o 
 -11   7   5        2.52        4.56      6.64 o 
 -10   7   5       54.67       55.25     10.34 o 
  -9   7   5        1.39       -0.41      4.81 o 
  -8   7   5        5.73       10.82      5.28 o 
  -7   7   5      103.35       82.86     10.74 o 
  -6   7   5        1.19       -0.73      3.70 o 
  -5   7   5        1.78        1.93      4.37 o 
  -4   7   5       86.96       77.88      8.38 o 
  -3   7   5        5.21        2.43      3.79 o 
  -2   7   5        1.53        0.05      3.80 o 
  -1   7   5        1.45        3.52      3.69 o 
   0   7   5        4.80        8.48      3.84 o 
   1   7   5       78.79       87.61      7.89 o 
   2   7   5       36.70       18.11      4.67 o 
   3   7   5        0.54       -3.75      3.75 o 
   4   7   5        1.79        4.56      5.33 o 
   5   7   5       22.25       11.24      6.22 o 
   6   7   5        0.77       -6.18      6.18 o 
   7   7   5        2.81        4.50      8.30 o 
   8   7   5       33.77       32.54     11.29 o 
 -10   8   5        4.44        4.31      7.37 o 
  -9   8   5        0.77        1.36      5.37 o 
  -8   8   5       28.84       29.52      6.78 o 
  -7   8   5        2.82        3.77      4.80 o 
  -6   8   5        1.50        2.73      4.96 o 
  -5   8   5        1.53       -4.22      4.22 o 
  -4   8   5        2.68       -1.51      4.41 o 
  -3   8   5        0.10       -3.83      3.83 o 
  -2   8   5        0.00        1.92      4.47 o 
  -1   8   5        0.23        2.93      4.58 o 
   0   8   5        0.09       -0.31      3.94 o 
   1   8   5        2.10        3.10      3.94 o 
   2   8   5       21.53       32.17      6.09 o 
   3   8   5        1.62       -1.83      4.15 o 
   4   8   5        6.07        2.30      5.07 o 
   5   8   5       46.38       34.68     11.97 o 
   6   8   5       15.69       11.81      9.22 o 
  -8   9   5        1.89        4.03      6.17 o 
  -7   9   5        3.83        2.28      5.70 o 
  -6   9   5       34.77       25.41      7.91 o 
  -5   9   5       67.07       57.00      8.95 o 
  -4   9   5        1.53        3.94      5.52 o 
  -3   9   5        2.41       -0.49      4.71 o 
  -2   9   5       14.63       15.43      6.22 o 
  -1   9   5        1.91       -2.35      5.26 o 
   0   9   5       45.72       56.38      9.53 o 
   1   9   5       19.91       18.29      5.95 o 
   2   9   5        5.04        2.94      4.83 o 
   3   9   5       36.04       44.44      8.44 o 
   4   9   5        0.22        8.40      7.53 o 
  -4  10   5        6.97        4.52      7.57 o 
  -3  10   5        2.56       -2.46      7.44 o 
  -2  10   5        1.99       -1.06      7.40 o 
  -1  10   5        0.17       -2.16      6.93 o 
 -16   0   6       83.47       60.57     12.77 o 
 -15   0   6      292.57      319.28     22.01 o 
 -14   0   6       66.23       94.06     13.26 o 
 -13   0   6     1679.65     1814.83     47.26 o 
 -12   0   6       94.34      110.17     10.09 o 
 -11   0   6     1562.95     1654.18     29.72 o 
 -10   0   6      685.67      649.66     15.70 o 
  -9   0   6      126.01      114.72      6.47 o 
  -8   0   6      136.93      154.99      8.11 o 
  -7   0   6      214.44      160.03     16.45 o 
  -6   0   6     2998.08     3148.96     52.55 o 
  -5   0   6        0.43        2.22      2.17 o 
  -4   0   6    21078.85    22563.36    370.22 o 
  -3   0   6      480.13      479.03     12.11 o 
  -2   0   6      200.40      200.39      6.83 o 
  -1   0   6      439.53      481.16     12.69 o 
   0   0   6     1900.38     2034.26     39.16 o 
   1   0   6       94.21      118.57     10.54 o 
   2   0   6        2.77       -0.03      2.16 o 
   3   0   6       79.22       52.28      5.51 o 
   4   0   6      190.56      201.17     10.87 o 
   5   0   6      622.44      660.46     25.15 o 
   6   0   6        4.41        6.23      5.64 o 
   7   0   6        4.47        3.65      6.07 o 
   8   0   6       11.21       12.49     12.08 o 
   9   0   6      328.72      362.17     23.81 o 
  10   0   6        0.21        0.10     11.41 o 
  11   0   6       71.67       76.45     16.23 o 
 -16   1   6        0.10        1.00      6.02 o 
 -15   1   6       94.60      119.49     15.89 o 
 -14   1   6      238.74      262.29     11.98 o 
 -13   1   6      173.04      173.86      9.50 o 
 -12   1   6       72.46       72.28      6.79 o 
 -11   1   6       50.38       51.88      4.40 o 
 -10   1   6      202.18      202.02      6.61 o 
  -9   1   6      299.15      304.32      9.37 o 
  -8   1   6      821.46      822.97     15.19 o 
  -7   1   6      546.36      506.17     12.70 o 
  -6   1   6       59.19       57.16      3.72 o 
  -5   1   6      171.22      186.54      7.98 o 
  -4   1   6      857.42      980.89     13.10 o 
  -3   1   6       88.42       92.90      3.62 o 
  -2   1   6      501.14      507.35      7.71 o 
  -1   1   6       14.05       12.49      2.28 o 
   0   1   6       98.28       76.40      3.96 o 
   1   1   6      501.26      510.17      9.87 o 
   2   1   6      194.29      170.39      5.87 o 
   3   1   6       23.73       21.73      3.00 o 
   4   1   6      332.70      330.93     11.85 o 
   5   1   6        0.62        0.57      3.03 o 
   6   1   6        0.00        1.55      3.52 o 
   7   1   6       18.40        8.01      4.91 o 
   8   1   6       37.86       62.39      8.43 o 
   9   1   6       15.70       10.64      5.58 o 
  10   1   6       12.44       25.60      9.24 o 
  11   1   6       90.09       86.13     11.43 o 
 -16   2   6        2.15       -3.79      5.65 o 
 -15   2   6       24.17       25.60      6.84 o 
 -14   2   6        0.14        0.74      4.72 o 
 -13   2   6       76.97      102.27      9.63 o 
 -12   2   6      142.77      150.88     10.42 o 
 -11   2   6      522.12      542.07     13.86 o 
 -10   2   6       92.41      108.58      5.80 o 
  -9   2   6       65.87       63.33      4.59 o 
  -8   2   6       86.61       78.94      4.57 o 
  -7   2   6      124.89      140.30      5.13 o 
  -6   2   6      163.23      227.84      5.81 o 
  -5   2   6      140.83      117.73      5.25 o 
  -4   2   6      781.39      805.26     13.60 o 
  -3   2   6      375.61      359.13      6.32 o 
  -2   2   6     1530.58     1619.02     15.73 o 
  -1   2   6      490.33      487.88      9.02 o 
   0   2   6       39.22       53.37      4.30 o 
   1   2   6      182.79      201.28      6.25 o 
   2   2   6      610.26      599.33     11.37 o 
   3   2   6        1.61        0.34      1.95 o 
   4   2   6       12.76        7.50      3.42 o 
   5   2   6      131.27      118.42      8.92 o 
   6   2   6       21.10       19.56      5.38 o 
   7   2   6        6.93       -1.00      4.50 o 
   8   2   6      101.05      123.49     11.35 o 
   9   2   6       44.90       44.52      8.68 o 
  10   2   6       36.97       34.37      8.26 o 
 -15   3   6        0.00       -2.49      4.78 o 
 -14   3   6      184.85      199.44     13.13 o 
 -13   3   6       16.62       25.99      6.24 o 
 -12   3   6      115.33      128.18     12.17 o 
 -11   3   6      129.01      130.09      9.23 o 
 -10   3   6        0.48       -1.51      2.64 o 
  -9   3   6      499.44      497.88     14.46 o 
  -8   3   6       44.35       40.51      4.41 o 
  -7   3   6       16.41       19.68      3.24 o 
  -6   3   6       92.85      101.76      6.93 o 
  -5   3   6       11.29       15.42      2.57 o 
  -4   3   6      274.47      260.46      7.53 o 
  -3   3   6      475.42      487.31      9.49 o 
  -2   3   6        6.64        5.52      1.87 o 
  -1   3   6      436.44      465.13      8.19 o 
   0   3   6      127.49      130.32      5.03 o 
   1   3   6        0.38        1.43      1.66 o 
   2   3   6        0.09        4.30      2.04 o 
   3   3   6       23.48       20.11      3.12 o 
   4   3   6      149.59      170.86     11.90 o 
   5   3   6      201.43      205.04     11.38 o 
   6   3   6       16.57       26.68      5.62 o 
   7   3   6      100.71      103.99     10.02 o 
   8   3   6        7.79       10.48      5.63 o 
   9   3   6        3.25       -5.07      5.07 o 
  10   3   6       19.00       10.87      7.39 o 
 -15   4   6       32.82       53.48     12.61 o 
 -14   4   6       44.10       27.58     12.48 o 
 -13   4   6       37.35       51.16     11.94 o 
 -12   4   6        2.90       -5.03      5.93 o 
 -11   4   6       17.30        8.93      5.27 o 
 -10   4   6      454.41      493.96     15.87 o 
  -9   4   6      186.03      205.90     10.39 o 
  -8   4   6        3.57        0.64      2.85 o 
  -7   4   6       91.93       82.26      7.46 o 
  -6   4   6       44.45       41.53      5.34 o 
  -5   4   6      175.02      183.22      8.87 o 
  -4   4   6       60.44       57.81      6.02 o 
  -3   4   6      238.00      229.23     11.95 o 
  -2   4   6        0.48        0.55      3.28 o 
  -1   4   6       35.30       41.36      4.77 o 
   0   4   6      416.99      420.63     11.81 o 
   1   4   6       28.55       27.99      3.83 o 
   2   4   6      311.61      311.56     12.95 o 
   3   4   6       29.81       24.38      3.85 o 
   4   4   6      108.65       97.78      9.55 o 
   5   4   6        7.98       10.30      4.41 o 
   6   4   6       56.55       71.69      9.93 o 
   7   4   6        0.32        0.87      5.50 o 
   8   4   6        1.80       11.09      6.75 o 
   9   4   6        7.48       12.03      7.73 o 
  10   4   6        2.90        5.95      7.52 o 
 -14   5   6        2.68       -6.07      6.07 o 
 -13   5   6       21.66       37.45     11.58 o 
 -12   5   6        3.63        2.92      5.77 o 
 -11   5   6       14.11       12.54      6.01 o 
 -10   5   6       43.21       39.47      6.50 o 
  -9   5   6        0.01        1.02      3.56 o 
  -8   5   6      379.17      368.41     13.99 o 
  -7   5   6      231.62      212.97     10.99 o 
  -6   5   6        0.23       -2.70      2.70 o 
  -5   5   6        3.27        2.13      3.03 o 
  -4   5   6        0.67       -2.33      2.33 o 
  -3   5   6        0.11        0.84      2.68 o 
  -2   5   6        8.94       14.85      3.57 o 
  -1   5   6      232.14      236.56      9.39 o 
   0   5   6       47.85       51.85      5.70 o 
   1   5   6       78.15       86.06      7.84 o 
   2   5   6        0.62        0.39      3.01 o 
   3   5   6      110.16       93.67      7.92 o 
   4   5   6        0.28        2.68      3.61 o 
   5   5   6        6.60        2.79      4.54 o 
   6   5   6       45.16       58.92      9.41 o 
   7   5   6       34.70       25.93      7.44 o 
   8   5   6       81.93       84.98     16.74 o 
   9   5   6        9.91        0.78      6.85 o 
 -13   6   6        0.00       -0.31     10.87 o 
 -12   6   6        9.27        6.18      6.20 o 
 -11   6   6        0.10        0.38      5.72 o 
 -10   6   6        8.53        5.90      4.73 o 
  -9   6   6       45.37       36.10      7.98 o 
  -8   6   6       21.55       26.50      5.80 o 
  -7   6   6       51.05       53.76      7.75 o 
  -6   6   6       21.48       15.75      4.88 o 
  -5   6   6      103.76      128.30      9.31 o 
  -4   6   6      105.03       90.25      8.43 o 
  -3   6   6        1.61        2.55      3.46 o 
  -2   6   6       10.53        6.00      3.71 o 
  -1   6   6       69.49       60.46      6.38 o 
   0   6   6       23.31       37.02      5.33 o 
   1   6   6       12.95       12.05      4.01 o 
   2   6   6        7.48        4.82      4.45 o 
   3   6   6       34.37       34.04      6.12 o 
   4   6   6       46.64       73.48     10.15 o 
   5   6   6        0.26        1.03      5.29 o 
   6   6   6       60.70       44.63     11.15 o 
   7   6   6       46.40       18.92     12.08 o 
   8   6   6        0.45       -6.42      8.26 o 
 -12   7   6       25.79       34.90      9.50 o 
 -11   7   6        0.24       -0.34      6.23 o 
 -10   7   6       14.97       13.32      5.79 o 
  -9   7   6       34.90       34.41      8.72 o 
  -8   7   6       30.49       33.85      8.45 o 
  -7   7   6       41.69       37.78      6.88 o 
  -6   7   6       13.13        8.89      5.05 o 
  -5   7   6      340.72      413.15     35.91 o 
  -4   7   6        3.87        2.14      3.82 o 
  -3   7   6       10.98       17.25      5.33 o 
  -2   7   6       39.43       34.33      6.36 o 
  -1   7   6       30.53       25.68      5.42 o 
   0   7   6       21.28       24.01      5.33 o 
   1   7   6        0.83       -1.32      3.74 o 
   2   7   6       27.40       27.99      5.64 o 
   3   7   6       15.53       19.44      5.85 o 
   4   7   6       20.56       17.78      7.08 o 
   5   7   6        0.78        5.36      6.10 o 
   6   7   6       13.02       27.60     10.19 o 
   7   7   6        0.25       -7.69      7.69 o 
 -10   8   6        0.10       -3.60      6.57 o 
  -9   8   6       19.64       15.41      6.73 o 
  -8   8   6       62.83       68.22      9.35 o 
  -7   8   6       15.53       23.13      6.48 o 
  -6   8   6       72.15       73.98      9.31 o 
  -5   8   6        7.40        9.08      5.03 o 
  -4   8   6        0.09        4.12      4.96 o 
  -3   8   6       16.95       10.92      5.19 o 
  -2   8   6       60.63       67.42      8.51 o 
  -1   8   6       90.20      113.38     14.70 o 
   0   8   6       11.70       16.62      5.23 o 
   1   8   6       32.28       21.91      5.72 o 
   2   8   6        6.65       13.48      5.37 o 
   3   8   6       18.03       16.43      5.68 o 
   4   8   6        9.89        1.82      5.60 o 
   5   8   6        3.12       -1.30      7.48 o 
  -8   9   6        8.79        8.56      7.67 o 
  -7   9   6       26.23       25.87      7.58 o 
  -6   9   6        4.96        7.73      5.82 o 
  -5   9   6        0.51        4.55      5.64 o 
  -4   9   6       25.77       19.19      7.22 o 
  -3   9   6        0.07       -4.83      5.01 o 
  -2   9   6        5.26        1.40      5.56 o 
  -1   9   6        1.14        4.69      5.63 o 
   0   9   6        8.36        3.18      6.09 o 
   1   9   6        0.08        2.45      5.20 o 
   2   9   6       29.16       42.33      7.48 o 
 -16   1   7        1.75        0.57      5.88 o 
 -15   1   7        5.76        2.51      4.78 o 
 -14   1   7       96.25       93.43     12.09 o 
 -13   1   7        8.73        4.72      4.57 o 
 -12   1   7     1612.48     1779.55     25.60 o 
 -11   1   7      317.81      318.69      9.59 o 
 -10   1   7      342.31      334.29      9.30 o 
  -9   1   7      148.43      130.36      5.30 o 
  -8   1   7        1.52        1.35      1.57 o 
  -7   1   7        7.11        3.75      1.85 o 
  -6   1   7       33.32       34.77      3.17 o 
  -5   1   7      702.89      723.56     11.58 o 
  -4   1   7       16.58        8.68      1.96 o 
  -3   1   7        8.93       12.88      2.52 o 
  -2   1   7      131.05      121.00      4.13 o 
  -1   1   7       11.20        7.66      2.03 o 
   0   1   7        2.93        4.75      1.83 o 
   1   1   7      182.14      175.52      9.19 o 
   2   1   7      569.84      597.82     11.72 o 
   3   1   7        0.24       -1.54      1.80 o 
   4   1   7        4.44       13.35      4.14 o 
   5   1   7       22.60       22.08      5.23 o 
   6   1   7       11.47       11.25      4.59 o 
   7   1   7        0.31       -3.50      4.35 o 
   8   1   7       88.11       85.55      9.87 o 
   9   1   7       44.23       46.58      8.92 o 
  10   1   7        7.66        2.64      6.47 o 
 -16   2   7       18.65       28.75      7.33 o 
 -15   2   7        0.06       -2.51      4.69 o 
 -14   2   7       18.93       11.75      5.31 o 
 -13   2   7      218.83      239.33     12.61 o 
 -12   2   7      287.86      317.99     15.57 o 
 -11   2   7      370.93      363.21     11.70 o 
 -10   2   7       42.54       43.83      5.01 o 
  -9   2   7        3.02        0.43      2.34 o 
  -8   2   7      141.58      140.02      6.59 o 
  -7   2   7      148.20      148.58      6.57 o 
  -6   2   7       19.84       24.10      3.29 o 
  -5   2   7      713.54      727.14     13.75 o 
  -4   2   7       16.09       29.12      3.36 o 
  -3   2   7      118.80      129.15      7.34 o 
  -2   2   7     1554.62     1622.02     16.74 o 
  -1   2   7      309.82      304.67     12.01 o 
   0   2   7        9.74       10.31      2.90 o 
   1   2   7        0.93       -0.05      1.71 o 
   2   2   7      101.26      123.53      5.75 o 
   3   2   7       91.80       98.86      5.58 o 
   4   2   7        0.28       -2.21      2.62 o 
   5   2   7        0.21        1.48      3.54 o 
   6   2   7        8.28        4.79      4.96 o 
   7   2   7        5.52       -3.21      4.53 o 
   8   2   7        0.06       -1.43      4.73 o 
   9   2   7        1.49       -0.55      6.00 o 
  10   2   7        1.73       -0.98      6.49 o 
 -15   3   7        0.00        4.90      5.23 o 
 -14   3   7       17.04       22.31      6.30 o 
 -13   3   7       36.35       37.28      7.97 o 
 -12   3   7        0.04        3.12      4.30 o 
 -11   3   7      658.78      661.95     16.15 o 
 -10   3   7       47.44       49.60      5.54 o 
  -9   3   7       13.40        8.05      3.05 o 
  -8   3   7      656.72      604.59     13.85 o 
  -7   3   7        1.01        0.29      2.19 o 
  -6   3   7      480.62      498.19     11.85 o 
  -5   3   7       40.39       42.41      4.02 o 
  -4   3   7      181.72      191.38      6.96 o 
  -3   3   7     1021.49     1029.10     15.29 o 
  -2   3   7       24.56       19.44      2.70 o 
  -1   3   7        8.88        7.91      2.64 o 
   0   3   7       86.73       78.28      6.38 o 
   1   3   7      552.45      500.97     12.29 o 
   2   3   7       70.22       83.26      6.02 o 
   3   3   7       13.34       14.60      3.20 o 
   4   3   7        7.25        5.21      3.38 o 
   5   3   7       64.44       70.07      7.99 o 
   6   3   7       38.41       46.03      7.59 o 
   7   3   7       86.92       97.29     11.04 o 
   8   3   7        4.58        7.62      5.95 o 
   9   3   7       19.79       20.87      7.67 o 
 -15   4   7        2.29        0.68      6.92 o 
 -14   4   7        5.68        4.70      8.35 o 
 -13   4   7       10.62       10.69      7.99 o 
 -12   4   7        0.99       -1.68      5.17 o 
 -11   4   7      173.54      199.30     11.18 o 
 -10   4   7        7.89        6.11      3.98 o 
  -9   4   7     1057.63     1109.71     24.57 o 
  -8   4   7        3.74        2.72      3.27 o 
  -7   4   7      465.76      440.82     14.44 o 
  -6   4   7        0.32       -0.41      3.41 o 
  -5   4   7       53.13       60.79      6.49 o 
  -4   4   7      122.12      125.68      7.84 o 
  -3   4   7       29.61       29.10      4.32 o 
  -2   4   7      277.18      282.63     12.07 o 
  -1   4   7      331.14      321.97     10.71 o 
   0   4   7      648.66      664.04     15.68 o 
   1   4   7       51.87       41.83      8.41 o 
   2   4   7        0.08        1.83      3.17 o 
   3   4   7       27.50       25.76      4.28 o 
   4   4   7        0.52       -3.08      3.08 o 
   5   4   7        6.23       -1.54      4.69 o 
   6   4   7        0.00       -2.30      4.95 o 
   7   4   7       87.83      104.97     16.45 o 
   8   4   7        9.02        3.79      6.91 o 
   9   4   7       91.12      106.47     19.91 o 
 -14   5   7       15.94        6.44      9.53 o 
 -13   5   7       19.99       28.46     11.77 o 
 -12   5   7       14.40       25.20      7.76 o 
 -11   5   7        8.05       -1.98      4.20 o 
 -10   5   7       21.74        9.57      4.86 o 
  -9   5   7      234.37      231.28     11.90 o 
  -8   5   7       12.24       24.22      5.14 o 
  -7   5   7      573.06      566.71     17.43 o 
  -6   5   7      298.05      285.49     12.32 o 
  -5   5   7      203.50      208.45     10.50 o 
  -4   5   7      105.92      109.20      8.06 o 
  -3   5   7       33.55       36.79      8.06 o 
  -2   5   7      246.89      237.40     14.65 o 
  -1   5   7       42.83       43.35      7.35 o 
   0   5   7      109.10      130.18      7.89 o 
   1   5   7        1.91        0.83      3.41 o 
   2   5   7      193.72      202.45     10.84 o 
   3   5   7       45.94       42.67      6.41 o 
   4   5   7        3.75       -2.22      4.30 o 
   5   5   7       14.68        9.98      6.69 o 
   6   5   7       44.06       45.38     11.37 o 
   7   5   7        6.39       -8.64      9.53 o 
   8   5   7       97.37      122.40     37.96 o 
 -13   6   7       67.03       71.72     20.67 o 
 -12   6   7        0.02        1.17      5.84 o 
 -11   6   7       10.67        9.48      6.37 o 
 -10   6   7       54.40       66.82      8.58 o 
  -9   6   7        0.84       -4.46      4.46 o 
  -8   6   7       22.25       23.48      5.82 o 
  -7   6   7       93.03      119.73     10.62 o 
  -6   6   7       48.43       37.39     11.70 o 
  -5   6   7       52.43       55.08      7.31 o 
  -4   6   7      112.82      130.08     15.46 o 
  -3   6   7       89.62       91.95     13.18 o 
  -2   6   7        1.86       -2.71      2.71 o 
  -1   6   7        8.85        4.58      3.59 o 
   0   6   7       57.23       52.91      6.44 o 
   1   6   7        5.93       -0.19      3.29 o 
   2   6   7      103.43      116.24     10.28 o 
   3   6   7       13.79       23.79      6.93 o 
   4   6   7      112.82      134.52     17.02 o 
   5   6   7        3.08        7.33      7.84 o 
   6   6   7       17.58        8.95      9.21 o 
   7   6   7        6.96       26.89     10.64 o 
 -12   7   7       10.97       12.55      9.19 o 
 -11   7   7        0.00       -3.38      6.33 o 
 -10   7   7       21.89       15.31      6.94 o 
  -9   7   7        8.08       12.15      5.68 o 
  -8   7   7        0.65        0.84      4.75 o 
  -7   7   7       26.97       25.57      6.42 o 
  -6   7   7        1.27       -4.05      4.05 o 
  -5   7   7       83.91       75.56     10.31 o 
  -4   7   7        7.67        7.25      6.70 o 
  -3   7   7        0.56       -3.88      3.93 o 
  -2   7   7        0.21        0.62      4.38 o 
  -1   7   7       14.18        9.51      4.20 o 
   0   7   7        6.52       10.29      4.66 o 
   1   7   7        5.45        4.40      4.41 o 
   2   7   7        3.39        3.05      4.27 o 
   3   7   7       56.48       59.12     10.41 o 
   4   7   7       26.93       24.70      8.22 o 
   5   7   7       16.31       26.10     11.54 o 
   6   7   7       17.66       23.97     11.46 o 
 -10   8   7       16.49       10.71     10.54 o 
  -9   8   7      144.32      148.64     13.32 o 
  -8   8   7        0.44       -0.80      5.33 o 
  -7   8   7      124.70      151.31     12.69 o 
  -6   8   7        2.51        1.06      5.49 o 
  -5   8   7       17.73       11.95      6.78 o 
  -4   8   7       26.45       26.39      7.32 o 
  -3   8   7       87.18      103.16     10.87 o 
  -2   8   7       28.62       31.29      7.50 o 
  -1   8   7        0.01        7.86      5.39 o 
   0   8   7        2.89        3.85      4.44 o 
   1   8   7       20.14       21.60      5.83 o 
   2   8   7        5.12       -0.28      4.90 o 
   3   8   7        4.22        2.38      5.63 o 
   4   8   7        0.69        5.64      6.15 o 
  -7   9   7       38.08       25.70      8.93 o 
  -6   9   7        0.09        0.53      5.93 o 
  -5   9   7       20.07       12.62      6.67 o 
  -4   9   7       43.05       31.20      7.87 o 
  -3   9   7        6.91       13.26      6.62 o 
  -2   9   7        0.00        1.42      5.77 o 
  -1   9   7        4.15        9.25      6.71 o 
   0   9   7        9.93       -0.84      5.62 o 
   1   9   7        0.09        3.43      5.42 o 
 -16   0   8        9.96       40.54     15.84 o 
 -15   0   8        7.24        9.13     11.28 o 
 -14   0   8       91.18       76.25     17.72 o 
 -13   0   8       88.56       86.22     12.41 o 
 -12   0   8      450.12      486.52     17.56 o 
 -11   0   8      242.46      232.63     11.94 o 
 -10   0   8       43.49       39.80      5.99 o 
  -9   0   8       35.58       38.86      5.56 o 
  -8   0   8       31.67       42.47      5.56 o 
  -7   0   8      120.89      111.62      8.51 o 
  -6   0   8      171.97      140.73      7.77 o 
  -5   0   8      324.66      276.31     10.45 o 
  -4   0   8       99.76       98.62      6.55 o 
  -3   0   8      275.17      260.94     12.79 o 
  -2   0   8      698.93      723.22     15.35 o 
  -1   0   8       97.74       94.16      9.83 o 
   0   0   8      248.45      228.28     17.42 o 
   1   0   8      133.72      143.38      8.66 o 
   2   0   8      436.37      422.10     24.82 o 
   3   0   8        8.47        6.46      3.75 o 
   4   0   8       78.77       72.42     13.02 o 
   5   0   8       26.86       30.07      8.49 o 
   6   0   8       18.24        4.84      7.29 o 
   7   0   8       58.11       68.09     20.40 o 
   8   0   8       12.81        5.67      9.02 o 
   9   0   8        0.10       -8.35      8.35 o 
 -16   1   8        0.05       -4.94      6.06 o 
 -15   1   8       97.91      115.18     22.40 o 
 -14   1   8        0.12       -3.42      3.93 o 
 -13   1   8      162.69      168.01     10.54 o 
 -12   1   8        0.50        0.28      2.99 o 
 -11   1   8       51.36       59.38      7.35 o 
 -10   1   8       49.25       49.69      5.17 o 
  -9   1   8       25.34       24.78      4.12 o 
  -8   1   8       36.32       33.89      4.14 o 
  -7   1   8       69.49       69.57      7.43 o 
  -6   1   8        9.95        7.09      2.51 o 
  -5   1   8        7.75        2.73      2.57 o 
  -4   1   8      355.12      413.86      9.62 o 
  -3   1   8        8.82       11.06      1.89 o 
  -2   1   8      531.36      537.78      9.76 o 
  -1   1   8       25.35       21.69      2.85 o 
   0   1   8      145.97      142.79     11.17 o 
   1   1   8       73.82       66.20      6.96 o 
   2   1   8       31.70       35.87      3.97 o 
   3   1   8        0.02        0.26      2.46 o 
   4   1   8        3.84       -2.73      3.91 o 
   5   1   8       53.81       62.22      7.77 o 
   6   1   8        6.94        7.29      4.94 o 
   7   1   8       19.31       15.09      6.32 o 
   8   1   8        0.00       -2.63      5.54 o 
   9   1   8        5.53        5.81      6.56 o 
 -16   2   8       33.48       20.63      6.79 o 
 -15   2   8       15.57       15.62      6.17 o 
 -14   2   8      122.56      134.78     11.00 o 
 -13   2   8        0.00       -0.01      7.02 o 
 -12   2   8       76.27       78.69      7.07 o 
 -11   2   8        9.54       10.35      3.62 o 
 -10   2   8      167.03      181.28     12.21 o 
  -9   2   8       34.49       20.56      3.87 o 
  -8   2   8      193.77      205.89      8.16 o 
  -7   2   8      355.61      400.26     10.95 o 
  -6   2   8        1.91        3.77      2.21 o 
  -5   2   8       13.33        8.23      2.47 o 
  -4   2   8      883.63      985.84     26.68 o 
  -3   2   8       41.67       34.27      3.65 o 
  -2   2   8       68.10       73.56      4.44 o 
  -1   2   8      322.48      351.36      8.28 o 
   0   2   8        0.04       -0.69      1.84 o 
   1   2   8        9.11        9.41      2.64 o 
   2   2   8        0.97        0.29      2.29 o 
   3   2   8       13.86       11.12      3.54 o 
   4   2   8       15.05       16.85      5.00 o 
   5   2   8        0.17        7.93      4.57 o 
   6   2   8        7.30        4.29      5.02 o 
   7   2   8       66.29       80.48     18.66 o 
   8   2   8        1.24        1.24      5.78 o 
   9   2   8        4.22        5.29      6.49 o 
 -15   3   8       20.40       14.94     11.60 o 
 -14   3   8       21.65        8.43      8.83 o 
 -13   3   8        5.54       -3.49      5.66 o 
 -12   3   8        3.05        1.48      3.96 o 
 -11   3   8       41.47       36.75      6.09 o 
 -10   3   8      454.88      540.97     29.60 o 
  -9   3   8       77.36       82.20      8.53 o 
  -8   3   8      215.87      191.81     13.32 o 
  -7   3   8      205.68      164.54      9.03 o 
  -6   3   8        0.27        0.73      2.87 o 
  -5   3   8       56.01       46.31     12.63 o 
  -4   3   8       56.80       55.88      6.11 o 
  -3   3   8      310.34      293.58     13.92 o 
  -2   3   8        1.54        4.14      3.02 o 
  -1   3   8      275.97      298.93     10.37 o 
   0   3   8       38.03       49.32      8.37 o 
   1   3   8       28.12       21.70      4.59 o 
   2   3   8       10.37        5.09      3.15 o 
   3   3   8       60.31       50.88      6.76 o 
   4   3   8        8.64       10.44      5.30 o 
   5   3   8        4.55        0.37      5.61 o 
   6   3   8        8.45        8.33      7.53 o 
   7   3   8        2.21        0.20      6.72 o 
   8   3   8       15.17        8.06      7.64 o 
 -15   4   8        1.65       -4.57      6.51 o 
 -14   4   8        5.28       10.05      8.52 o 
 -13   4   8       42.77       54.99     10.05 o 
 -12   4   8        5.23       -2.57      5.12 o 
 -11   4   8      276.24      303.74     13.78 o 
 -10   4   8      136.34      162.46     15.51 o 
  -9   4   8      161.19      182.49     10.59 o 
  -8   4   8       55.89       51.29      6.57 o 
  -7   4   8       12.34        8.49      4.12 o 
  -6   4   8      270.29      259.01     11.70 o 
  -5   4   8      266.92      250.49     19.03 o 
  -4   4   8       21.92       22.59      4.60 o 
  -3   4   8      412.89      364.63     13.44 o 
  -2   4   8      669.07      664.82     16.30 o 
  -1   4   8       21.52       13.36      5.22 o 
   0   4   8      110.44       95.99      7.50 o 
   1   4   8       57.51       46.81      6.29 o 
   2   4   8       84.86       90.90     12.40 o 
   3   4   8        0.05        1.16      4.21 o 
   4   4   8       36.98       16.70      8.41 o 
   5   4   8       19.80        0.23      6.85 o 
   6   4   8       64.49       75.15     11.91 o 
   7   4   8       18.98       13.76      8.45 o 
   8   4   8       35.92       48.55     13.49 o 
 -14   5   8       13.78       15.71     10.87 o 
 -13   5   8        6.48        2.64      6.71 o 
 -12   5   8        2.75        4.24      6.20 o 
 -11   5   8       21.08       14.74      7.18 o 
 -10   5   8       12.43       17.24      5.40 o 
  -9   5   8       81.97       78.13     10.81 o 
  -8   5   8      378.50      406.62     15.55 o 
  -7   5   8        2.54        5.65      4.18 o 
  -6   5   8      112.83      108.09     14.04 o 
  -5   5   8      444.39      463.85     15.96 o 
  -4   5   8        3.03        1.76      3.68 o 
  -3   5   8       35.87       36.32      6.07 o 
  -2   5   8       34.03       36.67      5.36 o 
  -1   5   8        0.10        1.83      3.25 o 
   0   5   8        0.05       -1.52      3.20 o 
   1   5   8       78.07       65.43     12.44 o 
   2   5   8       16.09        8.07      5.70 o 
   3   5   8        5.18        0.56      4.94 o 
   4   5   8       11.49        8.60      7.78 o 
   5   5   8       15.72       13.26      8.07 o 
   6   5   8        0.07       -5.39      8.46 o 
   7   5   8       11.72       13.73     13.69 o 
 -13   6   8       17.02       17.30      7.96 o 
 -12   6   8        0.59       -1.84      6.03 o 
 -11   6   8       32.03       23.82      8.41 o 
 -10   6   8        0.35        4.48      5.09 o 
  -9   6   8      484.58      526.54     23.54 o 
  -8   6   8      330.43      341.38     21.51 o 
  -7   6   8      682.33      722.98     21.67 o 
  -6   6   8      325.65      355.95     17.82 o 
  -5   6   8      506.65      583.48     24.84 o 
  -4   6   8       11.21        4.16      6.59 o 
  -3   6   8       28.16       15.30      5.50 o 
  -2   6   8       46.23       26.01      5.10 o 
  -1   6   8       70.49       57.39      6.88 o 
   0   6   8      362.73      382.31     14.21 o 
   1   6   8      104.13      118.83      9.46 o 
   2   6   8      477.05      507.55     23.25 o 
   3   6   8       19.61        9.22      7.55 o 
   4   6   8       37.00       29.74     11.54 o 
   5   6   8        0.92       -1.48      8.05 o 
   6   6   8        6.46        8.66      9.06 o 
 -11   7   8      137.67      169.10     13.42 o 
 -10   7   8       87.16       76.28      9.63 o 
  -9   7   8       22.64       25.97      6.80 o 
  -8   7   8      149.88      173.96     17.48 o 
  -7   7   8      234.82      222.82     13.24 o 
  -6   7   8       33.60       37.26     10.50 o 
  -5   7   8      103.66       96.60     10.34 o 
  -4   7   8      505.66      529.21     19.42 o 
  -3   7   8       44.67       43.44     11.74 o 
  -2   7   8      237.61      245.23     13.37 o 
  -1   7   8        0.99       -3.62      3.62 o 
   0   7   8        8.83        6.08      4.60 o 
   1   7   8        7.27        2.74      4.44 o 
   2   7   8        0.10       -4.73      4.73 o 
   3   7   8       45.34       36.56     10.04 o 
   4   7   8        1.31       -1.59      9.80 o 
  -9   8   8       45.49       38.27      9.34 o 
  -8   8   8        4.44       10.55      6.19 o 
  -7   8   8       70.41       55.32     12.90 o 
  -6   8   8       70.94       72.20     10.50 o 
  -5   8   8      195.33      228.82     18.91 o 
  -4   8   8        9.59       19.63      6.70 o 
  -3   8   8       50.64       47.54      8.49 o 
  -2   8   8        5.24       -5.07      5.07 o 
  -1   8   8        8.29       -1.31      4.81 o 
   0   8   8        5.54       10.94      5.49 o 
   1   8   8        4.23        7.36      5.63 o 
   2   8   8       51.45       37.46     11.04 o 
  -5   9   8       29.65       19.86      8.00 o 
  -4   9   8       10.66        3.54      6.32 o 
  -3   9   8       49.88       63.60      9.98 o 
  -2   9   8       10.22       -2.24      7.29 o 
 -16   1   9        3.49        4.41      7.70 o 
 -15   1   9       56.21       63.48     11.94 o 
 -14   1   9       24.95       44.68     11.20 o 
 -13   1   9        3.85        4.32      4.28 o 
 -12   1   9       18.56       18.03      4.84 o 
 -11   1   9      142.86      159.36      8.46 o 
 -10   1   9       70.15       77.52      6.50 o 
  -9   1   9       22.64       15.23      3.47 o 
  -8   1   9       82.90       98.97      8.34 o 
  -7   1   9      416.84      430.13     12.27 o 
  -6   1   9      127.82      112.13      6.24 o 
  -5   1   9        0.91       -0.62      2.21 o 
  -4   1   9      210.62      233.30      8.43 o 
  -3   1   9      119.76      130.15      5.88 o 
  -2   1   9       34.46       27.01      2.88 o 
  -1   1   9      205.85      204.93      7.24 o 
   0   1   9      274.02      278.55      8.58 o 
   1   1   9        0.40        0.89      2.27 o 
   2   1   9        2.33        4.24      2.73 o 
   3   1   9       18.66       21.97      6.05 o 
   4   1   9      113.58      112.39      9.81 o 
   5   1   9       39.49       31.99      9.06 o 
   6   1   9        0.01        1.26      5.36 o 
   7   1   9        2.04        0.41      5.59 o 
   8   1   9        0.88        0.25      6.36 o 
 -15   2   9        2.03       -1.15      5.96 o 
 -14   2   9        2.76        1.60      4.68 o 
 -13   2   9       62.91       60.01      7.68 o 
 -12   2   9      160.94      157.27      8.97 o 
 -11   2   9       48.93       50.74      5.98 o 
 -10   2   9      222.15      210.13      9.41 o 
  -9   2   9       46.59       41.84      4.91 o 
  -8   2   9       72.11       77.75      6.12 o 
  -7   2   9       19.58       22.40      4.20 o 
  -6   2   9       14.90       10.61      3.03 o 
  -5   2   9      963.32     1071.32     21.01 o 
  -4   2   9      474.04      487.78     12.25 o 
  -3   2   9      973.92      992.37     16.70 o 
  -2   2   9       10.81       10.35      2.73 o 
  -1   2   9      706.89      729.83     21.54 o 
   0   2   9        0.04       -1.19      2.64 o 
   1   2   9        1.02       -1.97      2.28 o 
   2   2   9      160.88      131.20      6.96 o 
   3   2   9        3.07        4.29      4.12 o 
   4   2   9       51.63       46.82      7.06 o 
   5   2   9        0.93       -4.58      4.58 o 
   6   2   9        9.48        7.83      5.79 o 
   7   2   9        3.94       -2.42      6.57 o 
 -15   3   9       13.60        3.14      6.79 o 
 -14   3   9        0.09       -2.22      7.10 o 
 -13   3   9        6.80        7.23      6.21 o 
 -12   3   9       48.05       53.24      9.71 o 
 -11   3   9      125.35      129.28     11.08 o 
 -10   3   9       88.02       80.06      8.17 o 
  -9   3   9      398.39      422.37     16.94 o 
  -8   3   9        0.51        0.00      3.12 o 
  -7   3   9      494.98      496.89     15.86 o 
  -6   3   9       60.91       53.57      6.45 o 
  -5   3   9      121.12      114.39      8.80 o 
  -4   3   9      264.58      276.46     11.64 o 
  -3   3   9        0.09        0.13      2.74 o 
  -2   3   9        4.91        4.23      3.17 o 
  -1   3   9      121.43      123.59      7.68 o 
   0   3   9        0.01        0.92      3.24 o 
   1   3   9       19.93       23.01      5.58 o 
   2   3   9       57.70       50.80      6.68 o 
   3   3   9        9.87       14.12      6.06 o 
   4   3   9       42.56       35.66     10.12 o 
   5   3   9       31.79       42.15     11.39 o 
   6   3   9       11.62        9.31      8.27 o 
   7   3   9        1.88       -4.30      6.67 o 
 -14   4   9        0.12        0.34      8.10 o 
 -13   4   9        0.98        5.65      6.25 o 
 -12   4   9       18.32       14.55      6.59 o 
 -11   4   9        4.44        9.72      5.09 o 
 -10   4   9       25.02       23.21      5.45 o 
  -9   4   9      172.28      155.12     10.05 o 
  -8   4   9      183.06      182.22     15.97 o 
  -7   4   9      518.74      534.45     17.31 o 
  -6   4   9      288.39      298.43     12.97 o 
  -5   4   9      121.47      127.11      9.52 o 
  -4   4   9       10.80        7.13      3.76 o 
  -3   4   9        6.94        5.46      3.37 o 
  -2   4   9       14.57       17.87      4.36 o 
  -1   4   9       21.26       15.64      4.75 o 
   0   4   9        7.71        0.33      3.90 o 
   1   4   9      107.07       91.35      8.92 o 
   2   4   9       12.38        4.30      6.83 o 
   3   4   9       50.65       34.46      7.59 o 
   4   4   9        4.12       -0.37      7.69 o 
   5   4   9        6.00        4.56      7.74 o 
   6   4   9        0.24        0.40      7.54 o 
 -14   5   9        6.92        9.13      9.82 o 
 -13   5   9       43.64       31.71     10.81 o 
 -12   5   9        0.80        0.36      4.74 o 
 -11   5   9        6.95        7.27      5.34 o 
 -10   5   9      138.99      148.52     11.53 o 
  -9   5   9       81.83       77.85      9.05 o 
  -8   5   9      727.59      810.21     25.85 o 
  -7   5   9       36.31       36.03      9.92 o 
  -6   5   9      903.27     1078.16     25.89 o 
  -5   5   9       22.86        8.55      5.88 o 
  -4   5   9      267.23      250.80     15.27 o 
  -3   5   9        1.58       -3.02      3.02 o 
  -2   5   9        0.18       -0.80      3.30 o 
  -1   5   9       25.26       14.97      4.42 o 
   0   5   9       14.97       24.79      7.64 o 
   1   5   9      264.43      272.57     14.87 o 
   2   5   9       19.95       20.56      6.67 o 
   3   5   9       28.31       16.59      9.16 o 
   4   5   9        8.00       24.08      9.82 o 
   5   5   9        1.48       12.98      8.39 o 
   6   5   9        0.84       -4.09      8.10 o 
 -12   6   9        1.92       -5.32      5.32 o 
 -11   6   9       69.60       53.98      8.41 o 
 -10   6   9      186.05      189.03     12.99 o 
  -9   6   9        9.27       11.11      5.59 o 
  -8   6   9      111.25      134.06     11.86 o 
  -7   6   9       72.89       71.54      8.81 o 
  -6   6   9       31.83       30.05      6.57 o 
  -5   6   9      298.41      310.00     16.60 o 
  -4   6   9       92.85       87.15     17.36 o 
  -3   6   9       91.77       98.60      9.91 o 
  -2   6   9       55.87       69.51     10.79 o 
  -1   6   9       23.98        7.12      4.64 o 
   0   6   9        2.85       -3.96      3.96 o 
   1   6   9       80.29       67.47      7.98 o 
   2   6   9        0.03       -3.08      4.59 o 
   3   6   9        5.98        4.86      7.02 o 
   4   6   9        7.05       13.33      9.71 o 
 -11   7   9       26.01       31.90      9.15 o 
 -10   7   9      114.11      121.22     12.36 o 
  -9   7   9        0.12        7.62      5.22 o 
  -8   7   9       79.74       95.18     13.02 o 
  -7   7   9        0.43        1.17      5.23 o 
  -6   7   9      464.54      491.67     19.25 o 
  -5   7   9        4.06        6.05      5.48 o 
  -4   7   9       37.02       19.31      6.50 o 
  -3   7   9       77.63       83.81     13.45 o 
  -2   7   9       22.49       23.30      7.13 o 
  -1   7   9        1.29        0.48      4.63 o 
   0   7   9       11.34       10.29      5.66 o 
   1   7   9        3.95        5.91      5.06 o 
   2   7   9        0.52       -1.66      6.56 o 
   3   7   9       70.25      106.79     13.47 o 
  -8   8   9        1.52        1.04      5.49 o 
  -7   8   9       34.95       31.09      7.67 o 
  -6   8   9       59.61       60.87      9.74 o 
  -5   8   9        2.54        5.42      5.63 o 
  -4   8   9       92.22       88.94     10.80 o 
  -3   8   9       33.05       11.75      6.39 o 
  -2   8   9       50.67       57.08      9.24 o 
  -1   8   9        4.74        5.63      5.33 o 
   0   8   9        0.05        5.13      5.39 o 
 -16   0  10       26.57       16.38     15.04 o 
 -15   0  10       86.77       83.23     19.33 o 
 -14   0  10       14.74       13.96     10.20 o 
 -13   0  10       12.52       11.24      7.07 o 
 -12   0  10        0.61        3.32      6.19 o 
 -11   0  10      243.13      237.68     25.10 o 
 -10   0  10        0.75        1.26      4.73 o 
  -9   0  10       70.57       48.44      8.92 o 
  -8   0  10      490.88      463.75     20.87 o 
  -7   0  10       25.70       45.56      8.33 o 
  -6   0  10       46.04       41.31     15.04 o 
  -5   0  10      110.75       79.82     15.04 o 
  -4   0  10      265.19      207.62     13.74 o 
  -3   0  10     1463.66     1436.09     25.35 o 
  -2   0  10     1350.81     1384.75     25.17 o 
  -1   0  10      235.53      224.48     11.27 o 
   0   0  10       83.54       70.37      7.78 o 
   1   0  10      119.65      116.20      9.17 o 
   2   0  10       49.54       70.83     21.48 o 
   3   0  10       64.32       78.76     12.68 o 
   4   0  10      137.09      169.00     16.60 o 
   5   0  10       48.98       51.91     12.62 o 
   6   0  10      147.58      144.86     18.50 o 
   7   0  10       81.58       81.95     15.70 o 
 -15   1  10       26.51       23.23      9.76 o 
 -14   1  10       21.52       14.66     15.17 o 
 -13   1  10      108.27       91.15      9.24 o 
 -12   1  10       22.13       18.50      4.98 o 
 -11   1  10      278.57      278.42     12.44 o 
 -10   1  10       33.05       26.27      5.33 o 
  -9   1  10      134.80      135.47      9.04 o 
  -8   1  10        6.23        0.80      2.79 o 
  -7   1  10        0.39       -2.14      2.37 o 
  -6   1  10      227.46      273.12      9.76 o 
  -5   1  10      151.74      161.87     14.17 o 
  -4   1  10      850.62      901.10     19.61 o 
  -3   1  10       50.87       53.97      4.67 o 
  -2   1  10      664.16      636.21     13.65 o 
  -1   1  10       60.88       48.42      5.26 o 
   0   1  10        0.44        0.56      2.54 o 
   1   1  10      130.54      139.17      8.96 o 
   2   1  10       96.09       93.03      9.76 o 
   3   1  10       17.35       27.24      7.36 o 
   4   1  10       21.61       12.11      5.70 o 
   5   1  10       11.55        0.21      6.45 o 
   6   1  10        0.61       -4.95      5.42 o 
   7   1  10        9.93       20.61      7.67 o 
 -15   2  10        1.09       -6.98     11.01 o 
 -14   2  10        6.90       -1.34     11.28 o 
 -13   2  10       29.56       17.49      6.39 o 
 -12   2  10      179.79      190.63     11.71 o 
 -11   2  10       24.90       28.66      5.92 o 
 -10   2  10        5.52        3.84      3.83 o 
  -9   2  10       31.97       30.15      6.70 o 
  -8   2  10        1.47        5.28      3.77 o 
  -7   2  10       13.43       15.90      4.52 o 
  -6   2  10      344.65      357.18     13.11 o 
  -5   2  10      139.72      124.64     10.71 o 
  -4   2  10     1015.20     1063.31     23.07 o 
  -3   2  10      354.76      383.25     12.20 o 
  -2   2  10       91.85       99.39      7.45 o 
  -1   2  10      244.82      255.47     10.36 o 
   0   2  10        0.19       -1.05      3.52 o 
   1   2  10      178.57      190.74     10.41 o 
   2   2  10       24.12       21.90      5.77 o 
   3   2  10      239.07      239.72     18.91 o 
   4   2  10      221.09      200.70     18.68 o 
   5   2  10       18.47        4.70      6.71 o 
   6   2  10        6.91       -1.22      6.64 o 
 -15   3  10       39.27       41.50     12.89 o 
 -14   3  10        0.24        8.28      6.44 o 
 -13   3  10       27.13       14.81      5.67 o 
 -12   3  10        0.15       -0.37      4.26 o 
 -11   3  10       55.55       53.51      7.71 o 
 -10   3  10        6.84        7.58      4.37 o 
  -9   3  10      137.93      159.98     20.00 o 
  -8   3  10       60.47       59.85      7.38 o 
  -7   3  10       27.80       28.78      5.84 o 
  -6   3  10      580.54      630.28     18.37 o 
  -5   3  10       28.88       16.81      6.58 o 
  -4   3  10      468.63      471.96     15.79 o 
  -3   3  10       34.25       36.18      5.24 o 
  -2   3  10       65.34       73.72      7.21 o 
  -1   3  10        2.63        6.06      3.49 o 
   0   3  10        8.66        6.70      4.14 o 
   1   3  10        1.96       -0.33      3.76 o 
   2   3  10       82.99      103.86     14.69 o 
   3   3  10       78.86       68.46     12.49 o 
   4   3  10        3.30        7.92      7.87 o 
   5   3  10        1.32        9.02      7.93 o 
   6   3  10        5.38        9.48      9.68 o 
 -14   4  10       31.94       30.17      9.19 o 
 -13   4  10        0.40       -2.21      5.09 o 
 -12   4  10       13.19        9.35      5.40 o 
 -11   4  10        5.32        6.98      5.09 o 
 -10   4  10       82.87       88.52      9.35 o 
  -9   4  10       89.26      105.57     11.20 o 
  -8   4  10       91.59       91.27      9.36 o 
  -7   4  10       17.01       13.26      4.96 o 
  -6   4  10      262.89      268.03     12.78 o 
  -5   4  10        5.53        1.20      3.63 o 
  -4   4  10       24.89       17.52      5.48 o 
  -3   4  10       18.89       16.89      4.47 o 
  -2   4  10      115.05      143.62     12.56 o 
  -1   4  10        0.50        1.08      3.85 o 
   0   4  10       39.16       39.82      9.93 o 
   1   4  10       16.11       11.25      5.21 o 
   2   4  10       20.43        9.12      5.98 o 
   3   4  10      161.16      194.33     30.34 o 
   4   4  10        2.28        4.41      8.43 o 
   5   4  10        0.05        6.35      9.40 o 
 -13   5  10       19.66       22.06      9.31 o 
 -12   5  10       61.73       45.41      8.11 o 
 -11   5  10        2.41        3.59      5.03 o 
 -10   5  10       73.55       66.84      8.76 o 
  -9   5  10       26.02       33.99      7.18 o 
  -8   5  10      153.63      148.98     11.86 o 
  -7   5  10      519.36      570.11     19.49 o 
  -6   5  10      180.83      194.41     11.75 o 
  -5   5  10       83.38       94.81      9.88 o 
  -4   5  10       40.44       51.08      7.78 o 
  -3   5  10        6.46        5.79      4.21 o 
  -2   5  10       78.43       70.69      7.72 o 
  -1   5  10        2.15        1.04      3.77 o 
   0   5  10       17.06       10.38      4.52 o 
   1   5  10       22.37       22.89      5.84 o 
   2   5  10       11.91        9.60      6.29 o 
   3   5  10        6.76       -5.01      8.83 o 
   4   5  10        1.26        1.07      8.35 o 
 -12   6  10        1.48        5.87      6.53 o 
 -11   6  10        0.99       -3.41      4.76 o 
 -10   6  10      123.37      123.31     15.97 o 
  -9   6  10        7.28       10.20      5.96 o 
  -8   6  10       42.29       38.38      8.33 o 
  -7   6  10        9.87        5.34      5.74 o 
  -6   6  10      146.33      180.60     13.18 o 
  -5   6  10       53.50       40.38     10.00 o 
  -4   6  10        2.16        3.76      4.75 o 
  -3   6  10       20.35       19.89      6.06 o 
  -2   6  10       12.26       13.18      4.86 o 
  -1   6  10        3.15        8.35      4.62 o 
   0   6  10        0.04        4.11      6.56 o 
   1   6  10       13.97       17.98      6.27 o 
   2   6  10        4.40        0.81      5.52 o 
   3   6  10        2.10       -4.88      8.18 o 
 -10   7  10       15.48        9.18      6.48 o 
  -9   7  10       77.54       84.79     10.59 o 
  -8   7  10        0.07       -0.52      4.79 o 
  -7   7  10       21.74       13.45      6.19 o 
  -6   7  10        0.09        4.40      5.45 o 
  -5   7  10       37.31       44.95      8.28 o 
  -4   7  10        2.96       -0.21      5.28 o 
  -3   7  10        1.08       -0.67      5.00 o 
  -2   7  10        6.07        6.53      5.35 o 
  -1   7  10        4.68        4.01      5.40 o 
   0   7  10        0.11       -4.35      4.58 o 
   1   7  10       10.91        2.89      6.53 o 
  -6   8  10        2.70        0.26      5.80 o 
  -5   8  10        5.71        0.07      5.65 o 
  -4   8  10        0.11       -5.26      5.47 o 
  -3   8  10        0.84       -1.24      5.93 o 
  -2   8  10        0.04      -10.47     10.47 o 
 -15   1  11       18.64       22.00      9.47 o 
 -14   1  11        5.84        0.17      4.75 o 
 -13   1  11        1.02       -4.30      4.30 o 
 -12   1  11        7.03        2.56      4.35 o 
 -11   1  11      208.70      200.06     11.38 o 
 -10   1  11        1.17        2.73      3.99 o 
  -9   1  11       50.35       15.12      8.95 o 
  -8   1  11        3.29        0.63      3.67 o 
  -7   1  11        0.04       -3.00      3.00 o 
  -6   1  11       11.95        3.97      3.67 o 
  -5   1  11       36.15       28.73      5.37 o 
  -4   1  11     1234.76     1314.13     23.71 o 
  -3   1  11       93.77       95.17     10.12 o 
  -2   1  11     1766.49     1835.43     26.22 o 
  -1   1  11      367.53      387.24     14.57 o 
   0   1  11      972.92     1032.61     23.41 o 
   1   1  11      166.40      207.98     11.00 o 
   2   1  11      232.85      237.17     17.94 o 
   3   1  11       51.08       36.69     10.91 o 
   4   1  11        1.03       13.61      7.29 o 
   5   1  11       50.78       42.04     14.02 o 
 -15   2  11        0.07        7.25     10.47 o 
 -14   2  11       14.33       19.00     16.78 o 
 -13   2  11       14.55       11.65      6.10 o 
 -12   2  11      101.06      109.73     12.02 o 
 -11   2  11       27.64       14.52      6.09 o 
 -10   2  11      152.81      138.64     11.85 o 
  -9   2  11       68.97       70.05      8.01 o 
  -8   2  11        6.62        7.93      4.31 o 
  -7   2  11       12.87        7.91      3.94 o 
  -6   2  11      639.82      657.82     18.78 o 
  -5   2  11      117.08      123.67     15.07 o 
  -4   2  11       90.12       96.31      8.83 o 
  -3   2  11       21.85       21.31      4.76 o 
  -2   2  11       42.87       33.22      5.40 o 
  -1   2  11      212.82      213.71     10.95 o 
   0   2  11      203.32      230.97     11.92 o 
   1   2  11        2.19       13.82      5.67 o 
   2   2  11        1.35        0.43      6.42 o 
   3   2  11       38.70       52.66     11.27 o 
   4   2  11        2.84       -1.23      7.69 o 
   5   2  11        4.14       -0.15      8.35 o 
 -14   3  11        2.88       -2.24      7.41 o 
 -13   3  11       27.77       37.54     15.37 o 
 -12   3  11       35.22       27.23      7.63 o 
 -11   3  11        8.04        7.13      5.08 o 
 -10   3  11      171.24      212.84     24.03 o 
  -9   3  11        6.60        4.30      4.31 o 
  -8   3  11      167.53      169.16     18.26 o 
  -7   3  11      114.46       95.40      9.41 o 
  -6   3  11      133.34      152.44     11.66 o 
  -5   3  11      635.15      665.62     31.62 o 
  -4   3  11      490.31      555.92     17.85 o 
  -3   3  11        0.67        0.68      3.39 o 
  -2   3  11      130.96      142.63      9.60 o 
  -1   3  11       94.34      102.32      8.66 o 
   0   3  11       78.70       87.10      8.26 o 
   1   3  11       18.25       19.20      7.12 o 
   2   3  11      373.85      410.74     25.06 o 
   3   3  11       13.73       -5.07      7.26 o 
   4   3  11       49.87       45.35     25.10 o 
 -13   4  11        0.18        5.29      5.71 o 
 -12   4  11       15.59        6.74      5.38 o 
 -11   4  11        0.97       -2.90      4.58 o 
 -10   4  11       85.86       82.13     12.79 o 
  -9   4  11        0.45        4.33      4.76 o 
  -8   4  11       93.11      108.33     10.20 o 
  -7   4  11       11.67        8.99      4.94 o 
  -6   4  11        0.53       -1.96      4.12 o 
  -5   4  11      178.46      207.67     19.34 o 
  -4   4  11        4.00        6.94      4.82 o 
  -3   4  11      125.16      181.68     16.49 o 
  -2   4  11       34.94       33.32      5.84 o 
  -1   4  11       70.73       85.42      8.34 o 
   0   4  11       14.23       12.45      5.78 o 
   1   4  11       29.48       23.07      6.51 o 
   2   4  11       60.41       78.45     15.56 o 
   3   4  11       37.73       69.82     13.75 o 
   4   4  11       46.16       23.97     10.91 o 
 -12   5  11        3.89        9.40      5.98 o 
 -11   5  11        0.17       -0.25      5.01 o 
 -10   5  11       33.82       36.07      7.32 o 
  -9   5  11       69.29       92.78     10.75 o 
  -8   5  11        0.18       -1.11      4.70 o 
  -7   5  11      156.48      174.10     14.49 o 
  -6   5  11        0.07       -0.10      4.54 o 
  -5   5  11       10.47        3.02      4.73 o 
  -4   5  11        0.01       -0.74      4.35 o 
  -3   5  11        3.54        3.31      4.46 o 
  -2   5  11       41.72       37.73      6.55 o 
  -1   5  11        2.60        4.71      4.51 o 
   0   5  11       10.12        5.49      5.06 o 
   1   5  11       26.10       30.89      8.88 o 
   2   5  11        7.54        0.49      8.35 o 
   3   5  11        0.48        1.84      9.09 o 
 -11   6  11        6.88        2.20      6.24 o 
 -10   6  11        3.45        4.60      5.86 o 
  -9   6  11        0.37        2.70      5.68 o 
  -8   6  11       29.06       35.68      7.82 o 
  -7   6  11        0.19       -0.71      4.72 o 
  -6   6  11        1.06        3.73      5.18 o 
  -5   6  11        2.55        1.51      5.27 o 
  -4   6  11        1.43       -0.94      4.79 o 
  -3   6  11       10.55        5.12      5.20 o 
  -2   6  11        5.52        6.01      5.11 o 
  -1   6  11        2.06       -0.13      4.65 o 
   0   6  11        2.66        2.88      5.23 o 
   1   6  11        0.01        0.88      5.72 o 
  -8   7  11       39.36       43.36      9.69 o 
  -7   7  11       12.05        1.04      5.73 o 
  -6   7  11        0.09       -1.90      5.20 o 
  -5   7  11       97.10       74.55     10.11 o 
  -4   7  11        0.80        1.61      6.08 o 
  -3   7  11       13.92        4.83      5.99 o 
  -2   7  11        8.42        2.04      7.24 o 
  -1   7  11        6.85       -0.37      5.11 o 
 -14   0  12       87.27      123.07     16.23 o 
 -13   0  12       26.85       25.41      9.38 o 
 -12   0  12       50.00       48.00     10.82 o 
 -11   0  12       30.22       15.79      7.53 o 
 -10   0  12       63.70       67.73     11.48 o 
  -9   0  12       57.58       56.35     24.97 o 
  -8   0  12       57.79       25.37      7.59 o 
  -7   0  12       83.13       64.34     10.36 o 
  -6   0  12       30.15       31.75      7.97 o 
  -5   0  12        5.50        7.72     11.41 o 
  -4   0  12      672.54      754.89     28.53 o 
  -3   0  12       51.76       38.79      7.10 o 
  -2   0  12       30.43       17.40      7.04 o 
  -1   0  12        3.45        1.84      4.97 o 
   0   0  12      148.61      128.22     14.03 o 
   1   0  12       59.44       60.95     16.91 o 
   2   0  12       13.90        7.79     10.20 o 
   3   0  12       33.63       25.86      9.78 o 
   4   0  12        2.53        5.82      8.79 o 
 -14   1  12        7.28        7.37      6.50 o 
 -13   1  12       31.07       46.11      9.23 o 
 -12   1  12        0.03       -0.46      5.31 o 
 -11   1  12       32.87       17.96      6.43 o 
 -10   1  12       17.58        8.59      5.30 o 
  -9   1  12       39.24       28.69      6.86 o 
  -8   1  12        3.74       -1.35      4.62 o 
  -7   1  12       59.18       67.47      9.42 o 
  -6   1  12        7.79        4.72      5.16 o 
  -5   1  12      115.55      144.84     11.40 o 
  -4   1  12       24.06       36.70      7.43 o 
  -3   1  12       33.67       21.99      7.52 o 
  -2   1  12      100.44      127.23      9.97 o 
  -1   1  12       75.82       84.94      7.87 o 
   0   1  12      110.68      120.86      9.64 o 
   1   1  12        6.30       14.19      9.80 o 
   2   1  12       17.77       -2.11      8.59 o 
   3   1  12        6.12       11.06      7.26 o 
   4   1  12        3.90       -1.66      7.60 o 
 -14   2  12        1.64        0.76      6.02 o 
 -13   2  12        3.00       -5.13      5.13 o 
 -12   2  12        4.22        2.39      5.32 o 
 -11   2  12       43.81       34.20     10.73 o 
 -10   2  12      133.08      127.23     14.42 o 
  -9   2  12       59.08       54.08     12.12 o 
  -8   2  12       53.38       29.34      7.15 o 
  -7   2  12        0.08       -4.11      4.11 o 
  -6   2  12       67.96       57.54      9.18 o 
  -5   2  12       91.65      100.36      9.92 o 
  -4   2  12        2.29        4.10      4.17 o 
  -3   2  12        3.74        3.26      3.88 o 
  -2   2  12      257.86      303.44     20.03 o 
  -1   2  12        6.13       11.44      4.43 o 
   0   2  12        9.62        4.18      4.66 o 
   1   2  12       12.91       17.84      8.75 o 
   2   2  12       10.12       15.44      8.92 o 
   3   2  12        0.07        0.60      8.60 o 
 -13   3  12        0.06       -0.64      6.12 o 
 -12   3  12        1.28        9.64      6.70 o 
 -11   3  12        2.25        1.56      5.71 o 
 -10   3  12        3.52       -0.95      5.29 o 
  -9   3  12       79.13       71.93      8.65 o 
  -8   3  12       45.43       27.33      6.52 o 
  -7   3  12        6.43        0.83      4.20 o 
  -6   3  12       37.06       30.89      6.28 o 
  -5   3  12       15.25        7.24      5.73 o 
  -4   3  12       94.66      109.52     10.47 o 
  -3   3  12        0.79       -2.90      3.76 o 
  -2   3  12        4.72        3.12      4.23 o 
  -1   3  12       13.16       13.18      5.02 o 
   0   3  12      324.84      336.42     13.76 o 
   1   3  12      139.31      163.60     14.69 o 
   2   3  12      220.61      255.85     22.21 o 
   3   3  12       25.78       39.17     18.53 o 
 -13   4  12        4.15        2.71      6.55 o 
 -12   4  12       41.22       26.34      7.12 o 
 -11   4  12        0.01        0.08      5.11 o 
 -10   4  12       15.48        8.14      5.49 o 
  -9   4  12       34.87       32.19      7.20 o 
  -8   4  12        1.44       -2.83      4.29 o 
  -7   4  12        2.05        1.39      3.94 o 
  -6   4  12       73.13       76.32     13.18 o 
  -5   4  12        5.05       -1.28      4.15 o 
  -4   4  12       34.54       24.70      6.25 o 
  -3   4  12       12.80       22.52      6.00 o 
  -2   4  12        0.54        1.61      4.30 o 
  -1   4  12       39.45       43.96      7.03 o 
   0   4  12       22.35       16.06      6.32 o 
   1   4  12        5.51        8.71      5.52 o 
   2   4  12       42.48       55.99     14.52 o 
 -11   5  12       10.91        3.71      6.08 o 
 -10   5  12        0.04        2.96      5.23 o 
  -9   5  12        7.32        1.92      5.51 o 
  -8   5  12       10.06       12.00      5.88 o 
  -7   5  12       25.80       23.82      6.72 o 
  -6   5  12       53.05       57.45     14.38 o 
  -5   5  12        5.73        5.34      5.60 o 
  -4   5  12       62.59       66.42      9.20 o 
  -3   5  12       16.16        6.74      5.02 o 
  -2   5  12        1.30        2.54      4.75 o 
  -1   5  12        0.95        3.46      5.02 o 
   0   5  12       20.92       19.92      7.29 o 
   1   5  12        3.72       -0.60      5.90 o 
  -9   6  12       16.67        3.27      6.10 o 
  -8   6  12       27.35       32.17      7.73 o 
  -7   6  12       13.74        6.02      6.51 o 
  -6   6  12       10.19        5.22      5.91 o 
  -5   6  12        0.10       -5.26      5.26 o 
  -4   6  12        0.09       -4.09      5.47 o 
  -3   6  12        0.02       -5.07      5.07 o 
  -2   6  12       25.71       26.32      6.89 o 
  -1   6  12        2.34        5.21      5.26 o 
 -14   1  13        5.38        8.52      6.95 o 
 -13   1  13       25.09       17.68      7.61 o 
 -12   1  13       14.69        5.89      5.82 o 
 -11   1  13       41.14       34.03      8.16 o 
 -10   1  13        2.24       -0.49      5.28 o 
  -9   1  13       68.15       97.67     13.02 o 
  -8   1  13      111.05      108.93     11.86 o 
  -7   1  13       39.95       48.44      8.44 o 
  -6   1  13        5.65        8.46      5.67 o 
  -5   1  13       12.18       29.60     11.98 o 
  -4   1  13       23.33       15.15      5.75 o 
  -3   1  13        5.97        4.56      4.42 o 
  -2   1  13      233.47      267.61     13.40 o 
  -1   1  13        6.97        4.81      6.39 o 
   0   1  13       32.81       43.94     12.82 o 
   1   1  13        0.06        3.76     12.62 o 
   2   1  13        2.20        8.59     12.35 o 
 -13   2  13        3.57        1.47      8.20 o 
 -12   2  13        0.65        1.18      6.06 o 
 -11   2  13        1.14        3.21      5.87 o 
 -10   2  13        1.20        4.49      5.68 o 
  -9   2  13       11.40       17.83      7.24 o 
  -8   2  13       66.95       60.38      9.63 o 
  -7   2  13        4.99        4.46      5.42 o 
  -6   2  13       11.44        6.72      5.53 o 
  -5   2  13      118.85      115.84     12.31 o 
  -4   2  13        0.00       -1.14      4.98 o 
  -3   2  13       18.00       15.87      7.98 o 
  -2   2  13       47.13       47.50      6.76 o 
  -1   2  13       46.39       53.91      7.20 o 
   0   2  13        8.46        7.72      5.44 o 
   1   2  13        2.10        0.79      8.32 o 
   2   2  13        1.78       15.04     10.47 o 
 -12   3  13        0.09        5.26      6.39 o 
 -11   3  13       21.78       10.72     10.25 o 
 -10   3  13       16.86       13.64      6.71 o 
  -9   3  13        5.93        9.28      6.41 o 
  -8   3  13       12.61       -4.09      7.01 o 
  -7   3  13       44.56       47.04     12.14 o 
  -6   3  13       18.25       21.72      6.33 o 
  -5   3  13       10.07       -0.51      4.56 o 
  -4   3  13        6.16        3.63      5.00 o 
  -3   3  13       22.30       21.28      5.73 o 
  -2   3  13       45.90       49.50      7.18 o 
  -1   3  13       78.67       88.98      9.01 o 
   0   3  13       35.84       23.67      8.89 o 
   1   3  13      147.62      143.10     15.35 o 
 -11   4  13        2.87        5.25      6.53 o 
 -10   4  13       24.41       15.57      7.45 o 
  -9   4  13       12.32        6.42      5.53 o 
  -8   4  13        7.13       10.66      5.80 o 
  -7   4  13        8.35        7.78      6.20 o 
  -6   4  13      110.26       83.11     10.11 o 
  -5   4  13       47.09       83.08     10.06 o 
  -4   4  13       59.94       54.06      8.38 o 
  -3   4  13        1.15       -1.23      4.85 o 
  -2   4  13       13.77        9.88      5.27 o 
  -1   4  13        0.02        7.59      5.34 o 
   0   4  13       18.49       19.62      7.67 o 
 -10   5  13        0.08        1.51      5.90 o 
  -9   5  13        4.95        6.78      6.63 o 
  -8   5  13       49.82       41.69      9.73 o 
  -7   5  13        8.56        3.10      5.59 o 
  -6   5  13        0.89       -4.38      5.51 o 
  -5   5  13       21.12       18.57      7.14 o 
  -4   5  13        8.43        8.21      5.84 o 
  -3   5  13        5.95        7.72      5.87 o 
  -2   5  13        0.19        7.63      5.74 o 
 -12   0  14       10.10       12.08     13.69 o 
 -11   0  14        3.92        5.64     11.54 o 
 -10   0  14       62.07       72.22     19.87 o 
  -9   0  14      156.30      179.61     25.77 o 
  -8   0  14       36.36       60.95     19.06 o 
  -7   0  14       16.09       28.19     13.16 o 
  -6   0  14       26.92       11.54     12.35 o 
  -5   0  14        1.66        7.79     11.28 o 
  -4   0  14        1.38        1.07      8.86 o 
  -3   0  14       35.13       25.77     13.69 o 
  -2   0  14      158.41      196.26     25.24 o 
  -1   0  14        8.49        4.03     11.54 o 
 -12   1  14        3.04        6.01      7.68 o 
 -11   1  14       15.01       16.18      7.51 o 
 -10   1  14        4.77       -3.45      6.07 o 
  -9   1  14        2.44       -5.19      5.19 o 
  -8   1  14        9.97       17.09      8.18 o 
  -7   1  14        0.71       -0.90      6.88 o 
  -6   1  14        5.14       10.18      5.95 o 
  -5   1  14       32.10       28.70      7.71 o 
  -4   1  14       26.52       15.09      6.56 o 
  -3   1  14       12.59        3.70      5.04 o 
  -2   1  14        2.41       10.64      5.77 o 
  -1   1  14       11.59       11.93      6.15 o 
   0   1  14       49.32       68.01     20.00 o 
 -12   2  14        1.81       -0.46      6.09 o 
 -11   2  14        2.92       -2.51      5.49 o 
 -10   2  14        3.45        0.82      6.10 o 
  -9   2  14        6.72        5.41      5.90 o 
  -8   2  14        0.20        5.28      6.29 o 
  -7   2  14        1.77       -0.58      6.32 o 
  -6   2  14       11.47        8.30      6.55 o 
  -5   2  14       22.24       28.72     13.10 o 
  -4   2  14        1.39        7.37      7.25 o 
  -3   2  14       11.20       20.32      5.96 o 
  -2   2  14       11.91        9.12      6.13 o 
  -1   2  14       16.97       35.21      9.49 o 
 -11   3  14        1.09       16.64      7.67 o 
 -10   3  14        9.64        8.39      6.87 o 
  -9   3  14        0.00       -4.08      7.35 o 
  -8   3  14        2.54       -1.75      6.65 o 
  -7   3  14       59.31       68.02     11.16 o 
  -6   3  14        3.71        0.55      6.39 o 
  -5   3  14        7.15       23.84      8.20 o 
  -4   3  14        9.51       15.45      9.27 o 
  -3   3  14       31.56       57.11      9.43 o 
  -2   3  14       26.16       33.86      7.07 o 
  -9   4  14       11.82       18.86      8.65 o 
  -8   4  14        3.50       -2.64      6.38 o 
  -7   4  14        4.81       -3.08      6.72 o 
  -6   4  14       11.70        8.30      6.07 o 
  -5   4  14        1.07       -0.86      5.63 o 
  -4   4  14       96.29      134.01     13.05 o 
  -3   4  14        5.99        1.14      5.42 o 
 -10   1  15       13.41       17.12      8.04 o 
  -9   1  15       73.89       84.78     12.02 o 
  -8   1  15        0.46       -3.95      5.37 o 
  -7   1  15       23.19       37.05     11.33 o 
  -6   1  15        0.64        2.81      6.43 o 
  -5   1  15       10.52        9.14      6.67 o 
  -4   1  15        3.62        6.58      6.95 o 
  -3   1  15        1.04       -0.84      6.13 o 
  -9   2  15       39.76       42.08     10.46 o 
  -8   2  15        2.84        5.87      7.32 o 
  -7   2  15        0.76       -6.43      6.43 o 
  -6   2  15       39.32       32.75      9.09 o 
  -5   2  15       11.89       -1.69      6.50 o 
  -4   2  15        0.76        2.75      6.92 o 
                                                 
