# Supplementary material for: Suppression of Kasha's rule as a mechanism for fluorescent molecular rotors and aggregation-induced emission
Source: Springer Nature journal article supplement (doi:10.1038/nchem.2612), 2016-09-26
Supplement: 41557_2017_BFnchem2612_MOESM11_ESM.mol [file 41557_2017_BFnchem2612_MOESM11_ESM.mol]

nchem.2612-comp2.mol
  ChemDraw09071614312D

 22 24  0  0  0  0  0  0  0  0999 V2000
   -1.7414    2.2646    0.0000 C   0  0  0  0  0  0  0  0  0  0  0  0
   -1.7414    1.4396    0.0000 C   0  0  0  0  0  0  0  0  0  0  0  0
   -1.0269    1.0271    0.0000 N   0  3  0  0  0  0  0  0  0  0  0  0
   -0.3124    1.4396    0.0000 C   0  0  0  0  0  0  0  0  0  0  0  0
   -0.3124    2.2646    0.0000 C   0  0  0  0  0  0  0  0  0  0  0  0
   -1.0269    2.6771    0.0000 C   0  0  0  0  0  0  0  0  0  0  0  0
    0.3996    1.0285    0.0000 C   0  0  0  0  0  0  0  0  0  0  0  0
    0.3996    0.2062    0.0000 N   0  0  0  0  0  0  0  0  0  0  0  0
   -0.3124   -0.2049    0.0000 N   0  0  0  0  0  0  0  0  0  0  0  0
   -0.3124   -1.0271    0.0000 C   0  0  0  0  0  0  0  0  0  0  0  0
   -1.0269    0.2049    0.0000 B   0  5  0  0  0  0  0  0  0  0  0  0
   -1.7414   -0.2076    0.0000 F   0  0  0  0  0  0  0  0  0  0  0  0
   -1.8238    0.4184    0.0000 F   0  0  0  0  0  0  0  0  0  0  0  0
   -1.0269   -1.4396    0.0000 C   0  0  0  0  0  0  0  0  0  0  0  0
   -1.0269   -2.2646    0.0000 C   0  0  0  0  0  0  0  0  0  0  0  0
   -0.3124   -2.6771    0.0000 C   0  0  0  0  0  0  0  0  0  0  0  0
    0.4020   -2.2646    0.0000 C   0  0  0  0  0  0  0  0  0  0  0  0
    0.4020   -1.4396    0.0000 C   0  0  0  0  0  0  0  0  0  0  0  0
   -1.7390   -1.0285    0.0000 C   0  0  0  0  0  0  0  0  0  0  0  0
    1.1141   -1.0285    0.0000 C   0  0  0  0  0  0  0  0  0  0  0  0
    1.1117    1.4396    0.0000 C   0  0  0  0  0  0  0  0  0  0  0  0
    1.8238    1.8507    0.0000 N   0  0  0  0  0  0  0  0  0  0  0  0
  7 21  1  0      
 21 22  3  0      
  1  2  2  0      
  2  3  1  0      
  3  4  2  0      
  4  5  1  0      
  5  6  2  0      
  6  1  1  0      
  4  7  1  0      
  7  8  2  0      
  8  9  1  0      
  9 10  1  0      
  3 11  1  0      
 11  9  1  0      
 11 12  1  0      
 11 13  1  0      
 10 14  2  0      
 14 15  1  0      
 15 16  2  0      
 16 17  1  0      
 17 18  2  0      
 18 10  1  0      
 14 19  1  0      
 18 20  1  0      
M  CHG  2   3   1  11  -1
M  STY  1   1 SUP
M  SLB  1   1   1
M  SAL   1  2  21  22
M  SBL   1  1   1
M  SMT   1 CN
M  SBV   1   1   -0.7121   -0.4111
M  END
